# Supplementary material for: The distribution and conservation of areas with microendemic species in a biodiversity hotspot: a multi-taxa approach
Source: PeerJ. 2024 Jan 15;12:e16779. doi: 10.7717/peerj.16779 (PMC10795537; doi:10.7717/peerj.16779)
Supplement: Supplemental Information 1 [file peerj-12-16779-s001.xlsx]

## Sheet: Data_description
Taxon	Angiosperms
	Freshwater fishes
	Terrestrial vertebrates: snakes
	Terrestrial vertebrates: small mammals
	Terrestrial vertebrates: passerine birds
Species	Scientific Name
Latitude	Record latitude (in decimal format)
Longitude	Record longitude (in decimal format)

## Sheet: Species Data
Group	Species	Latitude	Longitude
Terrestrial vertebrates: passerine birds	Calyptura cristata	-22.2474	-42.505
Terrestrial vertebrates: passerine birds	Calyptura cristata	-22.4839	-42.9823
Terrestrial vertebrates: passerine birds	Calyptura cristata	-21.9833	-42.3667
Terrestrial vertebrates: passerine birds	Calyptura cristata	-22.3667	-42.75
Terrestrial vertebrates: passerine birds	Calyptura cristata	-22.5167	-43.0167
Terrestrial vertebrates: passerine birds	Formicivora erythronotos	-23.024	-44.5505
Terrestrial vertebrates: passerine birds	Formicivora erythronotos	-22.9769	-44.5463
Terrestrial vertebrates: passerine birds	Formicivora erythronotos	-22.9828	-44.5432
Terrestrial vertebrates: passerine birds	Formicivora erythronotos	-22.9583	-44.5553
Terrestrial vertebrates: passerine birds	Formicivora erythronotos	-22.9771	-44.5466
Terrestrial vertebrates: passerine birds	Formicivora erythronotos	-22.9191	-44.3453
Terrestrial vertebrates: passerine birds	Formicivora erythronotos	-22.9754	-44.5483
Terrestrial vertebrates: passerine birds	Formicivora erythronotos	-23.0255	-44.556
Terrestrial vertebrates: passerine birds	Formicivora erythronotos	-22.9583	-44.5539
Terrestrial vertebrates: passerine birds	Formicivora erythronotos	-23.0246	-44.5527
Terrestrial vertebrates: passerine birds	Formicivora erythronotos	-22.9781	-44.5458
Terrestrial vertebrates: passerine birds	Formicivora erythronotos	-22.9585	-44.5552
Terrestrial vertebrates: passerine birds	Formicivora erythronotos	-22.9449	-44.5871
Terrestrial vertebrates: passerine birds	Formicivora erythronotos	-22.974	-44.5518
Terrestrial vertebrates: passerine birds	Formicivora erythronotos	-23.0355	-44.6735
Terrestrial vertebrates: passerine birds	Formicivora erythronotos	-23.0167	-44.5167
Terrestrial vertebrates: passerine birds	Formicivora erythronotos	-22.9142	-44.4677
Terrestrial vertebrates: passerine birds	Formicivora erythronotos	-22.9043	-44.3342
Terrestrial vertebrates: passerine birds	Formicivora erythronotos	-22.919	-44.3432
Terrestrial vertebrates: passerine birds	Formicivora erythronotos	-22.9825	-44.5438
Terrestrial vertebrates: passerine birds	Formicivora erythronotos	-22.9635	-44.5537
Terrestrial vertebrates: passerine birds	Formicivora erythronotos	-22.9789	-44.5454
Terrestrial vertebrates: passerine birds	Formicivora erythronotos	-23.0254	-44.5419
Terrestrial vertebrates: passerine birds	Formicivora erythronotos	-22.9708	-44.5494
Terrestrial vertebrates: passerine birds	Formicivora erythronotos	-22.9849	-44.542
Terrestrial vertebrates: passerine birds	Formicivora erythronotos	-23.012	-44.5351
Terrestrial vertebrates: passerine birds	Formicivora erythronotos	-23.0254	-44.5558
Terrestrial vertebrates: passerine birds	Formicivora erythronotos	-23.0254	-44.5558
Terrestrial vertebrates: passerine birds	Formicivora erythronotos	-22.9793	-44.545
Terrestrial vertebrates: passerine birds	Formicivora erythronotos	-23.0242	-44.5499
Terrestrial vertebrates: passerine birds	Formicivora erythronotos	-23.0004	-44.5384
Terrestrial vertebrates: passerine birds	Formicivora erythronotos	-23.024	-44.5501
Terrestrial vertebrates: passerine birds	Formicivora erythronotos	-22.9716	-44.5504
Terrestrial vertebrates: passerine birds	Formicivora erythronotos	-22.9552	-44.5577
Terrestrial vertebrates: passerine birds	Formicivora erythronotos	-22.9779	-44.5492
Terrestrial vertebrates: passerine birds	Formicivora erythronotos	-23.218	-44.7418
Terrestrial vertebrates: passerine birds	Formicivora erythronotos	-22.9927	-44.538
Terrestrial vertebrates: passerine birds	Formicivora erythronotos	-22.99	-44.539
Terrestrial vertebrates: passerine birds	Formicivora erythronotos	-22.9014	-44.3233
Terrestrial vertebrates: passerine birds	Formicivora erythronotos	-23.001	-44.541
Terrestrial vertebrates: passerine birds	Formicivora erythronotos	-23.2195	-44.7161
Terrestrial vertebrates: passerine birds	Formicivora erythronotos	-23.0217	-44.5486
Terrestrial vertebrates: passerine birds	Formicivora erythronotos	-22.971	-44.55
Terrestrial vertebrates: passerine birds	Formicivora erythronotos	-22.9862	-44.5406
Terrestrial vertebrates: passerine birds	Formicivora erythronotos	-22.9792	-44.5452
Terrestrial vertebrates: passerine birds	Formicivora erythronotos	-23.0027	-44.5431
Terrestrial vertebrates: passerine birds	Formicivora erythronotos	-23.0239	-44.5501
Terrestrial vertebrates: passerine birds	Formicivora erythronotos	-22.9921	-44.538
Terrestrial vertebrates: passerine birds	Formicivora erythronotos	-23.0217	-44.5233
Terrestrial vertebrates: passerine birds	Formicivora erythronotos	-22.9256	-44.3717
Terrestrial vertebrates: passerine birds	Formicivora erythronotos	-22.8	-43.9
Terrestrial vertebrates: passerine birds	Formicivora erythronotos	-23.03	-44.5901
Terrestrial vertebrates: passerine birds	Formicivora erythronotos	-22.9732	-44.5491
Terrestrial vertebrates: passerine birds	Formicivora erythronotos	-22.986	-44.5422
Terrestrial vertebrates: passerine birds	Formicivora erythronotos	-22.9578	-44.5581
Terrestrial vertebrates: passerine birds	Formicivora erythronotos	-23.0239	-44.5504
Terrestrial vertebrates: passerine birds	Formicivora erythronotos	-23.0256	-44.556
Terrestrial vertebrates: passerine birds	Formicivora erythronotos	-23.2167	-44.7267
Terrestrial vertebrates: passerine birds	Formicivora erythronotos	-23.025	-44.5529
Terrestrial vertebrates: passerine birds	Formicivora erythronotos	-23.0264	-44.5585
Terrestrial vertebrates: passerine birds	Formicivora erythronotos	-23.0245	-44.543
Terrestrial vertebrates: passerine birds	Formicivora erythronotos	-22.9577	-44.5552
Terrestrial vertebrates: passerine birds	Formicivora erythronotos	-23.0246	-44.5515
Terrestrial vertebrates: passerine birds	Formicivora erythronotos	-23.0248	-44.5529
Terrestrial vertebrates: passerine birds	Formicivora erythronotos	-23.0247	-44.5532
Terrestrial vertebrates: passerine birds	Formicivora erythronotos	-22.9746	-44.5492
Terrestrial vertebrates: passerine birds	Formicivora erythronotos	-23.0255	-44.5558
Terrestrial vertebrates: passerine birds	Formicivora erythronotos	-22.9913	-44.5159
Terrestrial vertebrates: passerine birds	Formicivora erythronotos	-23.0246	-44.5519
Terrestrial vertebrates: passerine birds	Formicivora erythronotos	-23.023	-44.5452
Terrestrial vertebrates: passerine birds	Formicivora erythronotos	-23.0258	-44.5413
Terrestrial vertebrates: passerine birds	Formicivora erythronotos	-23.0252	-44.5421
Terrestrial vertebrates: passerine birds	Formicivora erythronotos	-22.9901	-44.5389
Terrestrial vertebrates: passerine birds	Formicivora erythronotos	-22.9909	-44.5777
Terrestrial vertebrates: passerine birds	Formicivora erythronotos	-22.9148	-44.345
Terrestrial vertebrates: passerine birds	Formicivora erythronotos	-23.0262	-44.5574
Terrestrial vertebrates: passerine birds	Formicivora erythronotos	-23.2237	-44.7526
Terrestrial vertebrates: passerine birds	Formicivora erythronotos	-22.9517	-44.5673
Terrestrial vertebrates: passerine birds	Formicivora erythronotos	-22.955	-44.5576
Terrestrial vertebrates: passerine birds	Formicivora erythronotos	-23.0277	-44.5405
Terrestrial vertebrates: passerine birds	Formicivora erythronotos	-22.951	-44.4904
Terrestrial vertebrates: passerine birds	Formicivora erythronotos	-23.0256	-44.5593
Terrestrial vertebrates: passerine birds	Formicivora erythronotos	-22.9969	-44.538
Terrestrial vertebrates: passerine birds	Formicivora erythronotos	-22.9832	-44.5432
Terrestrial vertebrates: passerine birds	Formicivora erythronotos	-22.9789	-44.545
Terrestrial vertebrates: passerine birds	Formicivora erythronotos	-23.0165	-44.5442
Terrestrial vertebrates: passerine birds	Formicivora erythronotos	-23.0054	-44.502
Terrestrial vertebrates: passerine birds	Formicivora erythronotos	-22.8371	-44.1995
Terrestrial vertebrates: passerine birds	Formicivora erythronotos	-22.9969	-44.538
Terrestrial vertebrates: passerine birds	Formicivora erythronotos	-22.981	-44.5442
Terrestrial vertebrates: passerine birds	Formicivora erythronotos	-22.9542	-44.5589
Terrestrial vertebrates: passerine birds	Formicivora erythronotos	-22.9536	-44.5581
Terrestrial vertebrates: passerine birds	Formicivora erythronotos	-22.9913	-44.2859
Terrestrial vertebrates: passerine birds	Formicivora erythronotos	-22.9616	-44.5475
Terrestrial vertebrates: passerine birds	Formicivora erythronotos	-23.0338	-44.656
Terrestrial vertebrates: passerine birds	Formicivora erythronotos	-22.9695	-44.2695
Terrestrial vertebrates: passerine birds	Formicivora erythronotos	-22.9929	-44.5381
Terrestrial vertebrates: passerine birds	Formicivora erythronotos	-22.9688	-44.5478
Terrestrial vertebrates: passerine birds	Formicivora littoralis	-22.9289	-42.2968
Terrestrial vertebrates: passerine birds	Formicivora littoralis	-22.932	-42.493
Terrestrial vertebrates: passerine birds	Formicivora littoralis	-22.9331	-42.2366
Terrestrial vertebrates: passerine birds	Formicivora littoralis	-22.9411	-42.2327
Terrestrial vertebrates: passerine birds	Formicivora littoralis	-22.8723	-41.9865
Terrestrial vertebrates: passerine birds	Formicivora littoralis	-22.9367	-42.2931
Terrestrial vertebrates: passerine birds	Formicivora littoralis	-22.8334	-41.979
Terrestrial vertebrates: passerine birds	Formicivora littoralis	-22.8566	-42.0385
Terrestrial vertebrates: passerine birds	Formicivora littoralis	-22.9244	-42.4412
Terrestrial vertebrates: passerine birds	Formicivora littoralis	-22.9426	-42.074
Terrestrial vertebrates: passerine birds	Formicivora littoralis	-22.8737	-42.0002
Terrestrial vertebrates: passerine birds	Formicivora littoralis	-22.9377	-42.2946
Terrestrial vertebrates: passerine birds	Formicivora littoralis	-22.8507	-42.1946
Terrestrial vertebrates: passerine birds	Formicivora littoralis	-22.938	-42.2691
Terrestrial vertebrates: passerine birds	Formicivora littoralis	-22.4509	-42.7709
Terrestrial vertebrates: passerine birds	Formicivora littoralis	-22.9326	-42.3751
Terrestrial vertebrates: passerine birds	Formicivora littoralis	-22.8507	-42.0005
Terrestrial vertebrates: passerine birds	Formicivora littoralis	-22.937	-42.294
Terrestrial vertebrates: passerine birds	Formicivora littoralis	-22.8826	-42.1232
Terrestrial vertebrates: passerine birds	Formicivora littoralis	-22.9213	-42.3415
Terrestrial vertebrates: passerine birds	Formicivora littoralis	-22.9448	-42.147
Terrestrial vertebrates: passerine birds	Formicivora littoralis	-22.9326	-42.3754
Terrestrial vertebrates: passerine birds	Formicivora littoralis	-23.0334	-43.4876
Terrestrial vertebrates: passerine birds	Formicivora littoralis	-22.9303	-42.3981
Terrestrial vertebrates: passerine birds	Formicivora littoralis	-22.9177	-42.0381
Terrestrial vertebrates: passerine birds	Formicivora littoralis	-22.879	-42.0001
Terrestrial vertebrates: passerine birds	Formicivora littoralis	-22.8187	-42.1279
Terrestrial vertebrates: passerine birds	Formicivora littoralis	-22.5132	-41.9492
Terrestrial vertebrates: passerine birds	Formicivora littoralis	-22.9136	-42.6308
Terrestrial vertebrates: passerine birds	Formicivora littoralis	-22.9333	-42.4052
Terrestrial vertebrates: passerine birds	Formicivora littoralis	-22.9346	-42.2846
Terrestrial vertebrates: passerine birds	Formicivora littoralis	-22.9317	-42.4926
Terrestrial vertebrates: passerine birds	Formicivora littoralis	-22.8427	-42.1428
Terrestrial vertebrates: passerine birds	Formicivora littoralis	-22.9368	-42.3101
Terrestrial vertebrates: passerine birds	Formicivora littoralis	-22.9074	-42.0396
Terrestrial vertebrates: passerine birds	Formicivora littoralis	-22.9214	-42.3378
Terrestrial vertebrates: passerine birds	Formicivora littoralis	-22.9318	-42.2969
Terrestrial vertebrates: passerine birds	Formicivora littoralis	-22.8705	-42.3392
Terrestrial vertebrates: passerine birds	Formicivora littoralis	-22.938	-42.2839
Terrestrial vertebrates: passerine birds	Formicivora littoralis	-22.9372	-42.2947
Terrestrial vertebrates: passerine birds	Formicivora littoralis	-22.8435	-41.9839
Terrestrial vertebrates: passerine birds	Formicivora littoralis	-22.923	-42.2211
Terrestrial vertebrates: passerine birds	Formicivora littoralis	-22.869	-41.9839
Terrestrial vertebrates: passerine birds	Formicivora littoralis	-22.9309	-42.2335
Terrestrial vertebrates: passerine birds	Formicivora littoralis	-22.928	-42.28
Terrestrial vertebrates: passerine birds	Formicivora littoralis	-22.8698	-41.986
Terrestrial vertebrates: passerine birds	Formicivora littoralis	-22.9328	-42.4063
Terrestrial vertebrates: passerine birds	Formicivora littoralis	-22.9344	-42.405
Terrestrial vertebrates: passerine birds	Formicivora littoralis	-22.8803	-42.0027
Terrestrial vertebrates: passerine birds	Formicivora littoralis	-22.9338	-42.3978
Terrestrial vertebrates: passerine birds	Formicivora littoralis	-22.9139	-42.1563
Terrestrial vertebrates: passerine birds	Formicivora littoralis	-22.8428	-41.9853
Terrestrial vertebrates: passerine birds	Formicivora littoralis	-22.9175	-42.0392
Terrestrial vertebrates: passerine birds	Formicivora littoralis	-22.8679	-41.9878
Terrestrial vertebrates: passerine birds	Formicivora littoralis	-22.9355	-42.2846
Terrestrial vertebrates: passerine birds	Formicivora littoralis	-22.9266	-42.3426
Terrestrial vertebrates: passerine birds	Formicivora littoralis	-22.9339	-42.3978
Terrestrial vertebrates: passerine birds	Formicivora littoralis	-22.9334	-42.379
Terrestrial vertebrates: passerine birds	Formicivora littoralis	-22.9345	-42.4051
Terrestrial vertebrates: passerine birds	Formicivora littoralis	-22.9217	-42.3437
Terrestrial vertebrates: passerine birds	Formicivora littoralis	-22.9349	-42.2222
Terrestrial vertebrates: passerine birds	Formicivora littoralis	-22.8574	-42.0003
Terrestrial vertebrates: passerine birds	Formicivora littoralis	-22.8847	-42.0072
Terrestrial vertebrates: passerine birds	Formicivora littoralis	-22.8796	-42.0026
Terrestrial vertebrates: passerine birds	Formicivora littoralis	-22.9286	-42.1365
Terrestrial vertebrates: passerine birds	Formicivora littoralis	-22.937	-42.2802
Terrestrial vertebrates: passerine birds	Formicivora littoralis	-22.8432	-42.101
Terrestrial vertebrates: passerine birds	Formicivora littoralis	-22.8857	-42.0629
Terrestrial vertebrates: passerine birds	Formicivora littoralis	-22.9469	-42.0835
Terrestrial vertebrates: passerine birds	Formicivora littoralis	-22.9482	-42.8894
Terrestrial vertebrates: passerine birds	Formicivora littoralis	-22.8675	-42.0133
Terrestrial vertebrates: passerine birds	Formicivora littoralis	-22.9444	-42.1306
Terrestrial vertebrates: passerine birds	Formicivora littoralis	-23.0337	-43.4864
Terrestrial vertebrates: passerine birds	Formicivora littoralis	-22.9156	-42.0363
Terrestrial vertebrates: passerine birds	Formicivora littoralis	-22.8797	-42
Terrestrial vertebrates: passerine birds	Formicivora littoralis	-22.9375	-42.2916
Terrestrial vertebrates: passerine birds	Formicivora littoralis	-22.9291	-42.4479
Terrestrial vertebrates: passerine birds	Formicivora littoralis	-22.8677	-41.9857
Terrestrial vertebrates: passerine birds	Formicivora littoralis	-22.8819	-41.9982
Terrestrial vertebrates: passerine birds	Formicivora littoralis	-22.9353	-42.3392
Terrestrial vertebrates: passerine birds	Formicivora littoralis	-22.9235	-42.275
Terrestrial vertebrates: passerine birds	Formicivora littoralis	-22.9293	-42.4649
Terrestrial vertebrates: passerine birds	Lipaugus conditus	-22.3424	-42.5848
Terrestrial vertebrates: passerine birds	Lipaugus conditus	-22.3516	-42.5848
Terrestrial vertebrates: passerine birds	Lipaugus conditus	-22.3368	-42.5581
Terrestrial vertebrates: passerine birds	Lipaugus conditus	-22.3478	-42.5936
Terrestrial vertebrates: passerine birds	Lipaugus conditus	-22.2217	-42.5672
Terrestrial vertebrates: passerine birds	Lipaugus conditus	-22.4569	-43.0238
Terrestrial vertebrates: passerine birds	Lipaugus conditus	-22.436	-44.6091
Terrestrial vertebrates: passerine birds	Lipaugus conditus	-22.4719	-43.0001
Terrestrial vertebrates: passerine birds	Lipaugus conditus	-22.3455	-42.5581
Terrestrial vertebrates: passerine birds	Lipaugus conditus	-22.346	-42.5864
Terrestrial vertebrates: passerine birds	Lipaugus conditus	-22.3512	-42.5843
Terrestrial vertebrates: passerine birds	Lipaugus conditus	-22.4523	-42.9918
Terrestrial vertebrates: passerine birds	Lipaugus conditus	-22.4445	-42.6421
Terrestrial vertebrates: passerine birds	Lipaugus conditus	-22.3595	-42.5727
Terrestrial vertebrates: passerine birds	Lipaugus conditus	-22.2809	-42.533
Terrestrial vertebrates: passerine birds	Lipaugus conditus	-22.3222	-42.5533
Terrestrial vertebrates: passerine birds	Lipaugus conditus	-22.3468	-42.5864
Terrestrial vertebrates: passerine birds	Lipaugus conditus	-22.3594	-42.5739
Terrestrial vertebrates: passerine birds	Lipaugus conditus	-22.3495	-42.5848
Terrestrial vertebrates: passerine birds	Lipaugus conditus	-22.488	-43.0659
Terrestrial vertebrates: passerine birds	Lipaugus conditus	-22.4509	-42.7709
Terrestrial vertebrates: passerine birds	Lipaugus conditus	-22.3511	-42.584
Terrestrial vertebrates: passerine birds	Lipaugus conditus	-22.3092	-42.4988
Terrestrial vertebrates: passerine birds	Lipaugus conditus	-22.3657	-42.5496
Terrestrial vertebrates: passerine birds	Lipaugus conditus	-22.2193	-42.5706
Terrestrial vertebrates: passerine birds	Lipaugus conditus	-22.339	-42.568
Terrestrial vertebrates: passerine birds	Lipaugus conditus	-22.2939	-42.5406
Terrestrial vertebrates: passerine birds	Lipaugus conditus	-22.3501	-42.5834
Terrestrial vertebrates: passerine birds	Lipaugus conditus	-22.3459	-42.5869
Terrestrial vertebrates: passerine birds	Lipaugus conditus	-22.448	-43.01
Terrestrial vertebrates: passerine birds	Lipaugus conditus	-22.2227	-42.5627
Terrestrial vertebrates: passerine birds	Lipaugus conditus	-22.3506	-42.5833
Terrestrial vertebrates: passerine birds	Lipaugus conditus	-22.3103	-42.4968
Terrestrial vertebrates: passerine birds	Lipaugus conditus	-22.2189	-42.5608
Terrestrial vertebrates: passerine birds	Lipaugus conditus	-22.3402	-42.5795
Terrestrial vertebrates: passerine birds	Lipaugus conditus	-22.3438	-42.5851
Terrestrial vertebrates: passerine birds	Lipaugus conditus	-22.2641	-42.5769
Terrestrial vertebrates: passerine birds	Lipaugus conditus	-22.3272	-42.5789
Terrestrial vertebrates: passerine birds	Lipaugus conditus	-22.2275	-42.5645
Terrestrial vertebrates: passerine birds	Lipaugus conditus	-22.354	-42.5632
Terrestrial vertebrates: passerine birds	Lipaugus conditus	-22.3377	-42.5685
Terrestrial vertebrates: passerine birds	Lipaugus conditus	-22.3508	-42.5839
Terrestrial vertebrates: passerine birds	Lipaugus conditus	-22.2197	-42.5641
Terrestrial vertebrates: passerine birds	Lipaugus conditus	-22.317	-42.5149
Terrestrial vertebrates: passerine birds	Lipaugus conditus	-22.3583	-42.5297
Terrestrial vertebrates: passerine birds	Lipaugus conditus	-22.6	-43.45
Terrestrial vertebrates: passerine birds	Myrmotherula fluminensis	-22.45	-42.7753
Terrestrial vertebrates: passerine birds	Nemosia rourei	-19.8667	-40.8667
Terrestrial vertebrates: passerine birds	Nemosia rourei	-20.0833	-40.9167
Terrestrial vertebrates: passerine birds	Nemosia rourei	-20.3667	-40.65
Terrestrial vertebrates: passerine birds	Nemosia rourei	-20.5058	-41.0327
Terrestrial vertebrates: passerine birds	Nemosia rourei	-19.9073	-40.5532
Terrestrial vertebrates: passerine birds	Nemosia rourei	-20.4928	-41.0267
Terrestrial vertebrates: passerine birds	Nemosia rourei	-20.5037	-41.0401
Terrestrial vertebrates: passerine birds	Nemosia rourei	-20.4635	-41.0872
Terrestrial vertebrates: passerine birds	Nemosia rourei	-20.5652	-41.1102
Terrestrial vertebrates: passerine birds	Nemosia rourei	-20.4209	-41.0757
Terrestrial vertebrates: passerine birds	Nemosia rourei	-20.4705	-40.9828
Terrestrial vertebrates: passerine birds	Nemosia rourei	-20.618	-40.9869
Terrestrial vertebrates: passerine birds	Nemosia rourei	-20.4573	-40.9921
Terrestrial vertebrates: passerine birds	Nemosia rourei	-20.6662	-40.9808
Terrestrial vertebrates: passerine birds	Nemosia rourei	-20.3484	-41.2779
Terrestrial vertebrates: passerine birds	Nemosia rourei	-20.3502	-41.2642
Terrestrial vertebrates: passerine birds	Nemosia rourei	-20.618	-40.9869
Terrestrial vertebrates: passerine birds	Nemosia rourei	-20.4573	-40.992
Terrestrial vertebrates: passerine birds	Nemosia rourei	-20.5016	-41.0274
Terrestrial vertebrates: passerine birds	Nemosia rourei	-20.4167	-41.0085
Terrestrial vertebrates: passerine birds	Nemosia rourei	-20.4057	-41.0524
Terrestrial vertebrates: passerine birds	Myrmotherula snowi	-8.7158	-35.8427
Terrestrial vertebrates: passerine birds	Myrmotherula snowi	-9.22541	-35.8796
Terrestrial vertebrates: passerine birds	Myrmotherula snowi	-9.22516	-35.8795
Terrestrial vertebrates: passerine birds	Myrmotherula snowi	-9.2195	-35.8787
Terrestrial vertebrates: passerine birds	Myrmotherula snowi	-9.2144	-35.8726
Terrestrial vertebrates: passerine birds	Myrmotherula snowi	-9.2112	-35.8745
Terrestrial vertebrates: passerine birds	Myrmotherula snowi	-9.2106	-35.8717
Terrestrial vertebrates: passerine birds	Myrmotherula snowi	-9.2119	-35.8731
Terrestrial vertebrates: passerine birds	Myrmotherula snowi	-9.1692	-35.9002
Terrestrial vertebrates: passerine birds	Myrmotherula snowi	-8.72247	-35.8372
Terrestrial vertebrates: passerine birds	Myrmotherula snowi	-9.21366	-35.8717
Terrestrial vertebrates: passerine birds	Myrmotherula snowi	-9.25389	-35.7997
Terrestrial vertebrates: passerine birds	Myrmotherula snowi	-9.2114	-35.8771
Terrestrial vertebrates: passerine birds	Myrmotherula snowi	-9.21624	-35.8741
Terrestrial vertebrates: passerine birds	Myrmotherula snowi	-8.2834	-35.5834
Terrestrial vertebrates: passerine birds	Myrmotherula snowi	-9.3001	-35.9334
Terrestrial vertebrates: passerine birds	Myrmotherula snowi	-9.2395	-35.8389
Terrestrial vertebrates: passerine birds	Myrmotherula snowi	-9.20998	-35.8784
Terrestrial vertebrates: passerine birds	Myrmotherula snowi	-9.30294	-35.9401
Terrestrial vertebrates: passerine birds	Myrmotherula snowi	-9.30459	-35.938
Terrestrial vertebrates: passerine birds	Myrmotherula snowi	-9.1621	-35.87
Terrestrial vertebrates: passerine birds	Myrmotherula snowi	-9.23876	-35.8394
Terrestrial vertebrates: passerine birds	Myrmotherula snowi	-9.25	-35.83
Terrestrial vertebrates: passerine birds	Myrmotherula snowi	-9.30013	-35.9409
Terrestrial vertebrates: passerine birds	Myrmotherula snowi	-9.13905	-35.947
Terrestrial vertebrates: passerine birds	Myrmotherula snowi	-9.24263	-35.823
Terrestrial vertebrates: passerine birds	Myrmotherula snowi	-9.30579	-35.9413
Terrestrial vertebrates: passerine birds	Myrmotherula snowi	-9.30527	-35.9516
Terrestrial vertebrates: passerine birds	Myrmotherula snowi	-8.2834	-35.5834
Terrestrial vertebrates: passerine birds	Myrmotherula snowi	-8.2834	-35.5834
Terrestrial vertebrates: passerine birds	Myrmotherula snowi	-7.6191	-35.5033
Terrestrial vertebrates: passerine birds	Merulaxis stresemanni	-15.2047	-39.1672
Terrestrial vertebrates: passerine birds	Merulaxis stresemanni	-15.2047	-39.1672
Terrestrial vertebrates: passerine birds	Formicivora erythronotos	-23.0248	-44.517
Terrestrial vertebrates: passerine birds	Formicivora erythronotos	-23.0063	-44.3132
Terrestrial vertebrates: passerine birds	Formicivora erythronotos	-23.0092	-44.3175
Terrestrial vertebrates: passerine birds	Formicivora erythronotos	-23.0064	-44.3178
Terrestrial vertebrates: passerine birds	Formicivora erythronotos	-23.0257	-44.5034
Terrestrial vertebrates: passerine birds	Formicivora erythronotos	-23.0052	-44.3317
Terrestrial vertebrates: passerine birds	Formicivora erythronotos	-23.0067	-44.3181
Terrestrial vertebrates: passerine birds	Formicivora littoralis	-22.981	-42.025
Terrestrial vertebrates: passerine birds	Formicivora littoralis	-22.9836	-42.0139
Terrestrial vertebrates: passerine birds	Formicivora littoralis	-22.9942	-41.9875
Terrestrial vertebrates: passerine birds	Formicivora littoralis	-22.9789	-42.011
Terrestrial vertebrates: passerine birds	Formicivora littoralis	-22.8101	-41.9481
Terrestrial vertebrates: passerine birds	Formicivora littoralis	-22.9682	-42.0163
Terrestrial vertebrates: passerine birds	Formicivora littoralis	-22.95	-42.033
Terrestrial vertebrates: passerine birds	Formicivora littoralis	-22.9955	-41.9918
Terrestrial vertebrates: passerine birds	Formicivora littoralis	-22.9687	-42.0268
Terrestrial vertebrates: passerine birds	Formicivora littoralis	-22.9543	-42.0306
Terrestrial vertebrates: passerine birds	Formicivora littoralis	-22.9586	-42.0485
Terrestrial vertebrates: passerine birds	Formicivora littoralis	-22.4857	-41.8905
Terrestrial vertebrates: passerine birds	Formicivora littoralis	-22.9804	-42.03
Terrestrial vertebrates: passerine birds	Formicivora littoralis	-22.9508	-42.037
Terrestrial vertebrates: passerine birds	Formicivora littoralis	-22.9609	-42.0177
Terrestrial vertebrates: passerine birds	Formicivora littoralis	-22.9896	-42.0142
Terrestrial vertebrates: passerine birds	Formicivora littoralis	-22.9653	-42.0072
Terrestrial vertebrates: passerine birds	Formicivora littoralis	-22.9677	-42.9877
Terrestrial vertebrates: passerine birds	Formicivora littoralis	-22.9692	-42.018
Terrestrial vertebrates: passerine birds	Formicivora littoralis	-22.9527	-42.0667
Terrestrial vertebrates: passerine birds	Merulaxis stresemanni	-15.7903	-40.5253
Terrestrial vertebrates: passerine birds	Merulaxis stresemanni	-15.8109	-40.5312
Terrestrial vertebrates: passerine birds	Merulaxis stresemanni	-15.8158	-40.5163
Terrestrial vertebrates: passerine birds	Merulaxis stresemanni	-15.8062	-40.5176
Terrestrial vertebrates: passerine birds	Merulaxis stresemanni	-15.8062	-40.5181
Terrestrial vertebrates: passerine birds	Merulaxis stresemanni	-15.7881	-40.522
Terrestrial vertebrates: passerine birds	Merulaxis stresemanni	-15.7909	-40.5266
Terrestrial vertebrates: passerine birds	Merulaxis stresemanni	-15.7987	-40.5213
Terrestrial vertebrates: passerine birds	Merulaxis stresemanni	-15.8643	-40.5286
Terrestrial vertebrates: passerine birds	Merulaxis stresemanni	-15.8053	-40.5155
Terrestrial vertebrates: passerine birds	Merulaxis stresemanni	-15.7902	-40.5253
Terrestrial vertebrates: passerine birds	Merulaxis stresemanni	-15.5633	-40.4239
Terrestrial vertebrates: passerine birds	Merulaxis stresemanni	-15.806	-40.5176
Terrestrial vertebrates: passerine birds	Merulaxis stresemanni	-15.7903	-40.5253
Terrestrial vertebrates: passerine birds	Merulaxis stresemanni	-15.7909	-40.5266
Terrestrial vertebrates: passerine birds	Merulaxis stresemanni	-15.7319	-40.3932
Terrestrial vertebrates: passerine birds	Merulaxis stresemanni	-15.7903	-40.5261
Terrestrial vertebrates: passerine birds	Merulaxis stresemanni	-15.7899	-40.5225
Terrestrial vertebrates: passerine birds	Nemosia rourei	-20.2744	-41.2959
Freshwater fishes	Astyanax paranae Eigenmann 1914	-24.6758	-50.0008
Freshwater fishes	Pareiorhaphis parmula Pereira 2005	-25.8436	-49.7276
Freshwater fishes	Jenynsia eigenmanni (Haseman 1911)	-25.3333	-49.8333
Freshwater fishes	Glandulocauda melanopleura Eigenmann 1911	-25.3333	-49.8333
Freshwater fishes	Rhamdiopsis moreirai Haseman 1911	-25.3333	-49.8333
Freshwater fishes	Hyphessobrycon taurocephalus Ellis 1911	-25.3333	-49.8333
Freshwater fishes	Cnesterodon carnegiei Haseman 1911	-25.3333	-49.8333
Freshwater fishes	Deuterodon supparis Lucena & Lucena 1992	-27.0833	-49.5333
Freshwater fishes	Astyanax totae Haluch & Abilhoa 2005	-25.5839	-49.6356
Freshwater fishes	Heptapterus stewarti Haseman 1911	-25.5833	-49.5
Freshwater fishes	Astyanax gymnogenys Eigenmann 1911	-25.5833	-49.5
Freshwater fishes	Hasemania maxillaris Ellis 1911	-25.5833	-49.5
Freshwater fishes	Hasemania melanura Ellis 1911	-25.5833	-49.5
Freshwater fishes	Pareiorhaphis steindachneri Miranda Ribeiro 1918	-26.4467	-49.1247
Freshwater fishes	Deuterodon rosae (Steindachner 1908)	-26.2761	-49.16
Freshwater fishes	Trichomycterus naipi Wosiacki & Garavello 2004	-25.9167	-49.1833
Freshwater fishes	Trichomycterus castroi de Pinna 1992	-25.4333	-49.1
Freshwater fishes	Pareiorhaphis calmoni (Steindachner 1907)	-27.7519	-48.9033
Freshwater fishes	Deuterodon longirostris (Steindachner 1907)	-27.8204	-48.9803
Freshwater fishes	Pareiorhaphis splendens Bizerril 1995	-26.1889	-49.0518
Freshwater fishes	Phalloceros zsp. I	-26.1953	-48.9125
Freshwater fishes	Deuterodon langei Travassos 1957	-25.3159	-48.8893
Freshwater fishes	Homodiaetus graciosa Koch 2002	-25.3467	-48.8802
Freshwater fishes	Rhamdella ignobilis Steindachner 1907	-27.6881	-48.8215
Freshwater fishes	Rivulus haraldsiolii Berkenkamp 1984	-26.5	-48.6667
Freshwater fishes	Trichomycterus nigricans Valenciennes 1846	-26.5161	-48.8031
Freshwater fishes	Chasmocranus truncatorostris Borodin 1927	-26.3044	-48.8456
Freshwater fishes	Phalloceros zsp. R	-26.1892	-48.7033
Freshwater fishes	Pareiorhaphis azygolechis Pereira & Reis 2002	-25.9661	-48.8286
Freshwater fishes	Crenicichla tingui Kullander & Lucena 2006	-25.5833	-48.7167
Freshwater fishes	Phalloceros zsp. M	-25.5506	-48.6711
Freshwater fishes	Phalloceros zsp. N	-25.4119	-48.7722
Freshwater fishes	Isbrueckerichthys duseni (Miranda Ribeiro 1907)	-24.563	-48.6696
Freshwater fishes	Cnesterodon iguape Lucinda 2005	-24.5094	-48.8425
Freshwater fishes	Campellolebias chrysolineatus Costa Lacerda & Brasil 1989	-26.4167	-48.6333
Freshwater fishes	Phalloceros zsp. T	-25.9139	-48.5861
Freshwater fishes	Corydoras steindachneri Isbr√ºcker & Nijssen 1973	-25.5333	-48.6
Freshwater fishes	Leptolebias aureoguttatus (Cruz 1974)	-25.5167	-48.5333
Freshwater fishes	Crenicichla iguapina Kullander & Lucena 2006	-24.6	-48.6
Freshwater fishes	Geophagus iporangensis Haseman 1911	-24.6	-48.5667
Freshwater fishes	Pimelodella kronei (Miranda Ribeiro 1907)	-24.5833	-48.5999
Freshwater fishes	Pimelodella transitoria Miranda Ribeiro 1907	-24.6	-48.6
Freshwater fishes	Rhamdioglanis transfasciatus Miranda Ribeiro 1908	-24.6	-48.6
Freshwater fishes	Hisonotus leucofrenatus (Miranda Ribeiro 1908)	-24.5833	-48.59
Freshwater fishes	Lampiella gibbosa (Miranda Ribeiro 1908)	-24.5833	-48.5949
Freshwater fishes	Isbrueckerichthys alipionis (Gosline 1947)	-24.6	-48.6
Freshwater fishes	Kronichthys subteres Miranda Ribeiro 1908	-24.6	-48.6
Freshwater fishes	Bryconamericus microcephalus (Miranda Ribeiro 1908)	-24.6	-48.6
Freshwater fishes	Harttia kronei Miranda Ribeiro 1908	-24.6	-48.6
Freshwater fishes	Rineloricaria kronei Miranda Ribeiro 1911	-24.5833	-48.5999
Freshwater fishes	Trichomycterus tupinamba Wosiacki & Oyakawa 2005	-24.6	-48.6
Freshwater fishes	Trichomycterus guaraquessaba Wosiacki 2005	-25.2935	-48.2803
Freshwater fishes	Hypostomus tapijara Oyakawa Akama & Zanata 2005	-24.748	-48.3484
Freshwater fishes	Listrura boticario de Pinna & Wosiacki 2002	-25.2666	-48.2
Freshwater fishes	Otothyris juquiae Garavello Britski & Schaeferi 1998	-24.53	-48.1166
Freshwater fishes	Hypostomus agna (Miranda Ribeiro 1907)	-24.53	-48.1166
Freshwater fishes	Astyanax ribeirae Eigenmann 1911	-24.52	-48.1081
Freshwater fishes	Trichomycterus jacupiranga Wosiacki & Oyakawa 2005	-24.7361	-48.1228
Freshwater fishes	Phalloceros zsp. O	-24.3667	-47.8167
Freshwater fishes	Spintherobolus leptoura Weitzman & Malabarba 1999	-24.3666	-47.8499
Freshwater fishes	Kronichthys lacerta (Nichols 1919)	-24.34	-47.6581
Freshwater fishes	Campellolebias intermedius Costa & De Luca ¬´in¬ª Costa 2006	-24.34	-47.6581
Freshwater fishes	Isbrueckerichthys epakmos Pereira & Oyakawa 2003	-23.9728	-47.5739
Freshwater fishes	Hypostomus interruptus (Miranda Ribeiro 1918)	-24.3266	-47.5056
Freshwater fishes	Neoplecostomus ribeirensis Langeani 1990	-24.3266	-47.5049
Freshwater fishes	Campellolebias dorsimaculatus Costa Lacerda & Brasil 1989	-24.6314	-47.3889
Freshwater fishes	Ituglanis proops (Miranda Ribeiro 1908)	-24.6314	-47.3889
Freshwater fishes	Microcambeva ribeirae Costa Lima & Bizerril 2004	-24.1533	-47.1328
Freshwater fishes	Brachyhypopomus jureiae Triques & Khamis 2003	-24.4333	-47.0833
Freshwater fishes	Pseudotocinclus juquiae Takako Oliveira & Oyakawa 2005	-23.8333	-46.9333
Freshwater fishes	Spintherobolus papilliferus Eigenmann 1911	-23.6581	-46.5517
Freshwater fishes	Taunayia bifasciata (Eigenmann & Norris 1900)	-23.3944	-46.5872
Freshwater fishes	Pseudotocinclus tietensis (R. Ihering 1907)	-23.3858	-46.5655
Freshwater fishes	Trichomycterus paolence (Eigenmann 1917)	-23.3858	-46.5655
Freshwater fishes	Characidium oiticicai Travassos 1967	-23.7764	-46.325
Freshwater fishes	Chasmocranus lopezi Miranda Ribeiro 1968	-23.8892	-46.4589
Freshwater fishes	Rivulus santensis K√∂hler 1906	-23.9608	-46.3336
Freshwater fishes	Trichomycterus iheringi (Eigenmann 1917)	-23.9608	-46.3336
Freshwater fishes	Heptapterus multiradiatus Ihering 1907	-23.7166	-46.4166
Freshwater fishes	Glandulocauda melanogenys Eigenmann 1911	-23.6452	-46.1728
Freshwater fishes	Coptobrycon bilineatus (Ellis 1911)	-23.6452	-46.1728
Freshwater fishes	Hyphessobrycon duragenys Ellis 1911	-23.6452	-46.1728
Freshwater fishes	Hyphessobrycon griemi Hoedeman 1957	-23.85	-46.2166
Freshwater fishes	Hypostomus tietensis (Ihering 1905)	-23.5333	-45.85
Freshwater fishes	Oligobrycon microstomus Eigenmann 1915	-23.3053	-45.9658
Freshwater fishes	Phallotorynus fasciolatus Henn 1916	-23.3086	-45.935
Freshwater fishes	Piabina anhembi Silva & Kaefer 2003	-23.5269	-45.7644
Freshwater fishes	Pseudotocinclus parahybae Takako Oliveira & Oyakawa 2005	-22.7667	-45.45
Freshwater fishes	Pareiorhina brachyrhyncha Chamon Aranda & Buckup 2005	-22.7706	-45.4451
Freshwater fishes	Pareiorhina rudolphi (Miranda Ribeiro 1911)	-22.7904	-45.1052
Freshwater fishes	Trichomycterus mimonha Costa 1992	-22.8333	-45.1667
Freshwater fishes	Hemipsilichthys nimius Pereira Reis Souza & Lazzarotto 2003	-23.2142	-44.7911
Freshwater fishes	Listrura picinguabae Villa-Verde & Costa 2006	-23.3294	-44.7976
Freshwater fishes	Trichogenes longipinnis Britski & Ortega 1983	-23.3247	-44.7928
Freshwater fishes	Trichomycterus itatiayae Miranda Ribeiro 1906	-22.45	-44.8333
Freshwater fishes	Phalloceros zsp. G	-23.2736	-44.6864
Freshwater fishes	Phalloceros zsp. S	-23.3353	-44.6819
Freshwater fishes	Characidium lauroi Travassos 1949	-22.4244	-44.5356
Freshwater fishes	Trichomycterus potschi Barbosa & Costa 2003	-22.95	-44.3333
Freshwater fishes	Parotocinclus bidentatus Gauger & Buckup 2005	-22.4689	-44.4467
Freshwater fishes	Trichomycterus albinotatus Costa 1992	-22.5	-44.25
Freshwater fishes	Trichomycterus auroguttatus Costa 1992	-22.5	-44.25
Freshwater fishes	Trichomycterus mirissumba Costa 1992	-22.5	-44.25
Freshwater fishes	Leptolebias minimus (Myers 1942)	-22.8666	-43.7666
Freshwater fishes	Pimelodella eigenmanni (Boulenger 1891)	-22.5764	-43.6847
Freshwater fishes	Pseudotothyris janeirensis Britski & Garavello 1984	-22.5764	-43.6847
Freshwater fishes	Delturus parahybae Eigenmann & Eigenmann 1889	-22.4625	-43.8225
Freshwater fishes	Otothyris lophophanes Eigenmann & Eigenmann 1889	-22.9289	-43.5697
Freshwater fishes	Trichomycterus giganteus Lima & Costa 2005	-22.8353	-43.4989
Freshwater fishes	Characidium grajahuense Travassos 1944	-22.9294	-43.2667
Freshwater fishes	Characidium macrolepidotum (Peters 1868)	-22.9475	-43.2311
Freshwater fishes	Astyanax hastatus Myers 1928	-22.8764	-43.4233
Freshwater fishes	Astyanax scabripinnis (Jenyns 1842)	-22.8764	-43.4233
Freshwater fishes	Hyphessobrycon flammeus Myers 1924	-22.8764	-43.4233
Freshwater fishes	Harttia rhombocephala Miranda Ribeiro 1939	-22.8764	-43.4233
Freshwater fishes	Kryptolebias brasiliensis (Valenciennes 1821)	-22.9578	-43.4053
Freshwater fishes	Leptolebias marmoratus (Ladiges 1934)	-22.6583	-43.4294
Freshwater fishes	Listrura nematopteryx de Pinna 1988	-22.61	-43.1905
Freshwater fishes	Leptolebias opalescens (Myers 1942)	-22.6167	-43.2
Freshwater fishes	Leptolebias splendens (Myers 1942)	-22.6167	-43.2
Freshwater fishes	Steindachneridion parahybae (Steindachner 1876)	-22.1246	-43.198
Freshwater fishes	Leptolebias citrinipinnis (Costa Lacerda & Tanizaki 1988)	-22.9083	-42.8361
Freshwater fishes	Nematolebias papilliferus Costa 2002	-22.9207	-42.9282
Freshwater fishes	Leptolebias fractifasciatus (Costa 1988)	-22.8333	-42.9333
Freshwater fishes	Characidium vidali Travassos 1967	-22.495	-42.9964
Freshwater fishes	Trichomycterus goeldii Boulenger 1896	-22.4475	-42.9517
Freshwater fishes	Trichomycterus paquequerense (Miranda Ribeiro 1943)	-22.4481	-42.9831
Freshwater fishes	Bryconamericus ornaticeps Bizerril & Peres-Neto 1995	-22.4666	-42.6666
Freshwater fishes	Microglanis nigripinnis Bizerril & Perez-Neto 1992	-22.4666	-42.6666
Freshwater fishes	Homodiaetus passarellii (Miranda Ribeiro 1944)	-22.4666	-42.6666
Freshwater fishes	Neoplecostomus variipictus Bizerril 1995	-22.3064	-42.5911
Freshwater fishes	Phalloceros zsp. F	-22.0333	-42.7833
Freshwater fishes	Listrura tetraradiata Landim & Costa 2002	-22.9333	-42.5166
Freshwater fishes	Brachyhypopomus janeiroensis (Costa & Campos-da-Paz 1992)	-22.5666	-42.5666
Freshwater fishes	Bryconamericus tenuis Bizerril & Ara√©jo 1992	-22.565	-42.3636
Freshwater fishes	Rivulus janeiroensis Costa 1991	-22.6593	-42.4562
Freshwater fishes	Microcambeva barbata Costa & Bockmann 1994	-22.56	-42.5666
Freshwater fishes	Homodiaetus banguela Koch 2002	-22.5666	-42.5666
Freshwater fishes	Leptolebias cruzi (Costa 1988)	-22.6144	-42.0681
Freshwater fishes	Simpsonichthys constanciae (Myers 1942)	-22.6144	-42.0681
Freshwater fishes	Nematolebias whitei (Myers 1942)	-22.75	-42
Freshwater fishes	Pareiorhaphis garbei Ihering 1911	-22.3272	-41.9758
Freshwater fishes	Phalloceros zsp. E	-22.2467	-42.0783
Freshwater fishes	Parotocinclus muriaensis Gauger & Buckup 2005	-21.25	-41.75
Freshwater fishes	Rineloricaria steindachneri (Regan 1904)	-21.25	-41.75
Freshwater fishes	Brycon insignis Steindachner 1877	-21.6944	-41.4372
Freshwater fishes	Cheirodon parahybae Eigenmann 1915	-21.7528	-41.3386
Freshwater fishes	Pimelodella pectinifer Eigenmann & Eigenmann 1888	-21.7728	-41.3217
Freshwater fishes	Neoplecostomus espiritosantensis Langeani 1990	-20.4166	-40.8833
Freshwater fishes	Trichomycterus pantherinus Alencar & Costa 2004	-20.0544	-40.539
Freshwater fishes	Characidium timbuiense Travassos 1946	-19.975	-40.5478
Freshwater fishes	Trichomycterus longibarbatus Costa 1992	-19.8333	-40.4167
Freshwater fishes	Parotocinclus cesarpintoi Miranda Ribeiro 1939	-9.3333	-36.4833
Freshwater fishes	Aspidoras depinnai Britto 2000	-8.35	-35.4333
Freshwater fishes	Otothyris travassosi Garavello Britski & Schaefer 1998	-18.9978	-39.9923
Freshwater fishes	Simpsonichthys izecksohni (da Cruz 1983)	-19.0654	-39.9969
Freshwater fishes	Pseudauchenipterus affinis Steindachner 1876	-18.6436	-39.7711
Freshwater fishes	Aspidoras virgulatus Nijssen & Isbr√ºcker 1980	-18.7333	-39.8833
Freshwater fishes	Simpsonichthys myersi (Carvalho 1971)	-18.4953	-39.7378
Freshwater fishes	Leptolebias leitaoi (Cruz & Peixoto 1991)	-18.0983	-39.6374
Freshwater fishes	Microglanis pataxo Sarmento-Soares ¬´et al¬ª. 2006	-17.0261	-39.5989
Freshwater fishes	Phalloceros zsp. C	-16.1669	-39.3519
Freshwater fishes	Lignobrycon myersi (Miranda Ribeiro 1956)	-14.7647	-39.4055
Freshwater fishes	Rachoviscus graciliceps Weitzman & Cruz 1981	-17.3148	-39.2244
Freshwater fishes	Mimagoniates sylvicola Menezes & Weitzman 1990	-17.0811	-39.2802
Freshwater fishes	Ituglanis cahyensis Sarmento-Soares ¬´et al¬ª. 2006	-16.9631	-39.2758
Freshwater fishes	Trichomycterus bahianus Costa 1992	-15.1181	-39.1256
Freshwater fishes	Simpsonichthys bokermanni (Carvalho & Cruz 1987)	-14.7875	-39.2717
Freshwater fishes	Conorhynchos glaber Steindachner 1876	-16.45	-39.0667
Freshwater fishes	Pseudauchenipterus jequitinhonhae Steindachner 1876	-15.8794	-39.1061
Freshwater fishes	Simpsonichthys suzarti Costa 2004	-15.75	-39
Freshwater fishes	Hypostomus unae (Steindachner 1878)	-15.2472	-39.0506
Freshwater fishes	Gymnotus bahianus Campos-da-Paz & Costa 1996	-14.8167	-39.0333
Freshwater fishes	Parotocinclus cristatus Garavello 1977	-14.7069	-39.0764
Freshwater fishes	Pareiorhaphis bahianus (Gosline 1947)	-14.7069	-39.0764
Freshwater fishes	Phallotorynus pankalos Lucinda Rosa & Reis 2005	-23.7584	-55.2123
Freshwater fishes	Microglanis malabarbai Bertaco & Cardoso 2005	-28.1528	-54.9244
Freshwater fishes	Crenicichla minuano Lucena & Kullander 1992	-28.1525	-54.3708
Freshwater fishes	Crenicichla missioneira Lucena & Kullander 1992	-28.1525	-54.3708
Freshwater fishes	Hypostomus isbrueckeri Reis Weber & Malabarba 1990	-28.3822	-54.0328
Freshwater fishes	Austrolebias litzi Costa 2006	-29.6842	-53.8069
Freshwater fishes	Gymnogeophagus setequedas Reis & Malabarba 1988	-25.5639	-53.4086
Freshwater fishes	Psalidodon gymnodontus Eigenmann 1911	-25.5333	-53.0167
Freshwater fishes	Steindachneridion melanodermatum Garavello 2005	-25.5833	-53.0833
Freshwater fishes	Astyanax biotae Castro & Vari 2004	-22.6419	-52.8164
Freshwater fishes	Eurycheilichthys zsp. 1	-29.0525	-52.5806
Freshwater fishes	Hemiancistrus votouro Cardoso & Silva 2004	-27.4472	-52.6181
Freshwater fishes	Crenicichla jurubi Lucena & Kullander 1992	-27.1833	-52.5667
Freshwater fishes	Hemiancistrus meizospilos Cardoso & Silva 2004	-26.9114	-52.7031
Freshwater fishes	Microglanis eurystoma Malabarba & Mahler Jr. 1998	-27.3	-52.3333
Freshwater fishes	Apareiodon vladii Pavanelli 2006	-25.028	-52.4591
Freshwater fishes	Bryconamericus ecai Pezzi da Silva 2004	-29.5494	-52.2703
Freshwater fishes	Eurycheilichthys zsp. 2	-28.8067	-52.3039
Freshwater fishes	Eurycheilichthys limulus Reis & Schaefer 1998	-28.3514	-52.3082
Freshwater fishes	Eurycheilichthys zsp. 4	-28.3581	-52.2642
Freshwater fishes	Crenicichla prenda Lucena & Kullander 1992	-27.1878	-52.1672
Freshwater fishes	Characidium serrano Buckup & Reis 1997	-27.1664	-52.1468
Freshwater fishes	Trichomycterus mboycy Wosiacki & Garavello 2004	-25.75	-52.1667
Freshwater fishes	Trichomycterus papilliferus Wosiacki & Garavello 2004	-25.75	-52.1667
Freshwater fishes	Trichomycterus plumbeus Wosiacki & Garavello 2004	-25.75	-52.1667
Freshwater fishes	Trichomycterus taroba Wosiacki & Garavello 2004	-25.75	-52.1667
Freshwater fishes	Trichomycterus diabolus Bockmann Casatti & de Pinna 2004	-22.5911	-52.2439
Freshwater fishes	Hypostomus luteus (Godoy 1980)	-27.4575	-51.9147
Freshwater fishes	Jenynsia diphyes Lucinda Ghedotti & Gra√ßa 2006	-25.7564	-52.0564
Freshwater fishes	Pimelodus atrobrunneus Vidal & Lucena 1999	-27.6333	-51.8667
Freshwater fishes	Leporinus amae Godoy 1980	-27.533	-51.866
Freshwater fishes	Eurycheilichthys zsp. 3	-28.6344	-51.6147
Freshwater fishes	Trichomycterus stawiarski (Miranda Ribeiro 1968)	-26.1667	-51.5
Freshwater fishes	Cnesterodon omorgmatos Lucinda & Garavello 2000	-25.6956	-51.6597
Freshwater fishes	Crenicichla haroldoi Luengo & Britski 1974	-20.7647	-51.6433
Freshwater fishes	Eurycheilichthys zsp. 5	-28.3642	-51.2981
Freshwater fishes	Crenicichla igara Lucena & Kullander 1992	-27.5964	-51.3972
Freshwater fishes	Isbruekerichthys calvus Jerep Shibatta Pereira & Oyakawa 2006	-23.5791	-51.3702
Freshwater fishes	Sternarchorhynchus britskii Campos-da-Paz 2000	-20.4148	-51.3756
Freshwater fishes	Tembeassu marauna Triques 1998	-20.4148	-51.3756
Freshwater fishes	Pimelodus paranaensis Britski & Langeani 1988	-20.4148	-51.3756
Freshwater fishes	Eurycheilichthys zsp. 6	-28.3906	-51.0561
Freshwater fishes	Tatia boemia Koch & Reis 1996	-27.85	-51.1143
Freshwater fishes	Pogonopoma obscurum Quevedo & Reis 2002	-27.65	-51.0833
Freshwater fishes	Hypobrycon leptorhynchus Silva & Malabarba 1996	-27.55	-51.2
Freshwater fishes	Glanidium ribeiroi Haseman 1911	-26.2219	-51.1228
Freshwater fishes	Austrolebias carvalhoi (Myers 1947)	-26.2381	-51.0783
Freshwater fishes	Isbruekerichthys saxicola Jerep Shibatta Pereira & Oyakawa 2006	-23.2417	-51.2181
Freshwater fishes	Bryconamericus lambari Malabarba & Kindel 1995	-29.6	-51.0167
Freshwater fishes	Microglanis garavelloi Shibatta & Benine 2005	-23.2067	-50.9472
Freshwater fishes	Gymnogeophagus labiatus (Hensel 1870)	-29.6458	-50.8025
Freshwater fishes	Hypobrycon maromba Malabarba & Malabarba 1994	-27.1833	-50.6333
Freshwater fishes	Hemiancistrus punctulatus Cardoso & Malabarba 1999	-29.7911	-50.4342
Freshwater fishes	Astyanax cremnobates Bertaco & Malabarba 2001	-29.3833	-50.5333
Freshwater fishes	Astyanax brachypterygium Bertaco & Malabarba 2001	-28.6	-50.4
Freshwater fishes	Rivulus vittatus Costa 1989	-19	-50.5
Freshwater fishes	Crenicichla maculata Kullander & Lucena 2006	-29.5294	-50.2315
Freshwater fishes	Epactionotus bilineatus Reis & Schaefer 1998	-29.6351	-50.2239
Freshwater fishes	Pareiorhaphis hypselurus Pereira & Reis 2002	-29.545	-50.2392
Freshwater fishes	Deuterodon stigmaturus (Gomes 1947)	-29.5235	-50.3143
Freshwater fishes	Odontostoechus lethostigmus Gomes 1947	-29.5233	-50.3142
Freshwater fishes	Rineloricaria maquinensis Reis & Cardoso 2001	-29.6667	-50.2
Freshwater fishes	Rineloricaria quadrensis Reis 1983	-29.7	-50.25
Freshwater fishes	Microglanis cibelae Malabarba & Mahler Jr. 1998	-29.5519	-50.2988
Freshwater fishes	Eurycheilichthys zsp. 7	-29.2833	-50.2333
Freshwater fishes	Eurycheilichthys pantherinus Reis & Schaefer 1992	-28.6275	-50.3189
Freshwater fishes	Pareiorhaphis hystrix Pereira & Reis 2002	-28.655	-50.3069
Freshwater fishes	Rineloricaria aequalicuspis Reis & Cardoso 2001	-29.5119	-50.0919
Freshwater fishes	Jenynsia unitaenia Ghedotti & Weitzman 1995	-29.1666	-49.95
Freshwater fishes	Scleromystax salmacis Britto & Reis 2005	-29.1706	-49.9814
Freshwater fishes	Epactionotus itaimbezinho Reis & Schaefer 1998	-29.2053	-49.9458
Freshwater fishes	Cyanocharax itaimbe Malabarba & Weitzman 2003	-29.2053	-49.9458
Freshwater fishes	Cnesterodon brevirostratus Rosa & Costa 1993	-29.1578	-50.1439
Freshwater fishes	Bryconamericus patriciae Pezzi da Silva 2004	-28.6719	-49.9656
Freshwater fishes	Pareiorhaphis vestigipinnis Pereira & Reis 1992	-27.9167	-50.0833
Freshwater fishes	Bryconamericus turiuba Langeani ¬´et al¬ª. 2005	-20.9664	-50.0183
Freshwater fishes	Crenicichla britskii Kullander 1982	-21.4905	-49.8129
Freshwater fishes	Pimelodella avanhandavae Eigenmann 1917	-21.2411	-49.9219
Freshwater fishes	Jenynsia sanctaecatarinae Ghedotti & Weitzman 1996	-28.833	-49.666
Freshwater fishes	Epactionotus gracilis Reis & Schaefer 1998	-28.5833	-49.4833
Freshwater fishes	Pareiorhaphis nudulus Reis & Pereira 1999	-28.5833	-49.45
Freshwater fishes	Pareiorhaphis stomias Pereira & Reis 2002	-28.4683	-49.5017
Freshwater fishes	Pareiorhaphis eurycephalus Pereira & Reis 2002	-28.0592	-49.4283
Freshwater fishes	Campellolebias brucei Vaz-Ferreira & Sierra 1974	-28.75	-49.25
Freshwater fishes	Glanidium catharinensis Miranda Ribeiro 1962	-28.3258	-49.1767
Freshwater fishes	Jenynsia weitzmani Ghedotti Downing Meisner & Lucinda 2001	-27.9	-49.1333
Freshwater fishes	Otothyropsis marapoama Ribeiro Carvalho & Melo 2005	-21.1931	-49.1228
Freshwater fishes	Deuterodon singularis Lucena & Lucena 1992	-28.3448	-48.9811
Freshwater fishes	Rivulus luelingi Seegers 1984	-26.5042	-48.6458
Freshwater fishes	Hypostomus variipictus (Ihering 1911)	-20.4306	-48.4911
Freshwater fishes	Chasmocranus brachynema Gomes & Schubart 1958	-20.8833	-48.1667
Freshwater fishes	Imparfinis schubarti (Gomes 1956)	-20.88	-48.16
Freshwater fishes	Glanidium cesarpintoi von Ihering 1928	-21.9333	-47.3667
Freshwater fishes	Hypostomus topavae (Godoy 1969)	-21.9333	-47.3667
Freshwater fishes	Astyanax trierythropterus Godoy 1970	-21.9333	-47.3667
Freshwater fishes	Pimelodus heraldoi Azpelicueta 2001	-21.9333	-47.3667
Freshwater fishes	Pimelodus platicirris Borodin 1927	-21.9333	-47.3667
Freshwater fishes	Corydoras flaveolus Ihering 1911	-23.1667	-47.2667
Freshwater fishes	Neoplecostomus paranensis Langeani 1990	-21.3237	-47.2503
Freshwater fishes	Harttia gracilis Oyakawa 1993	-20.9667	-46.7833
Freshwater fishes	Trichomycterus maracaya Bockmann & Sazima 2004	-21.7792	-46.5306
Freshwater fishes	Trichomycterus candidus (Miranda Ribeiro 1949)	-21	-46.25
Freshwater fishes	Trichomycterus triguttatus (Eigenmann 1918)	-22.5	-45.8333
Freshwater fishes	Parodon moreirai Ingenito & Buckup 2005	-22.4486	-45.3464
Freshwater fishes	Pareiorhina carrancas Bockmann & Ribeiro 2003	-21.4444	-44.6025
Freshwater fishes	Trichomycterus pauciradiatus Alencar & Costa 2006	-21.4444	-44.6025
Freshwater fishes	Harttia torrenticola Oyakawa 1993	-20.3333	-44.0333
Freshwater fishes	Pareiorhaphis mutuca Oliveira & Oyakawa 1999	-20	-43.9167
Freshwater fishes	Harttia leiopleura Oyakawa 1993	-20	-43.9167
Freshwater fishes	Harttia novalimensis Oyakawa 1993	-20	-43.9167
Freshwater fishes	Neoplecostomus franciscoensis Langeani 1990	-20.1	-43.9167
Freshwater fishes	Hemipsilichthys papillatus Pereira Oliveira & Oyakawa 2000	-22.0333	-43.7833
Freshwater fishes	Microlepidogaster perforatus Eigenmann & Eigenmann 1889	-20.95	-43.8
Freshwater fishes	Trichomycterus trefauti Wosiacki 2004	-18.6125	-43.5617
Freshwater fishes	Trichomycterus immaculatus (Eigenmann & Eigenmann 1889)	-21.6667	-43.4167
Freshwater fishes	Brycon opalinus (Cuvier 1819)	-19.0822	-43.4313
Freshwater fishes	Astyanax pedri Eigenmann 1908	-19.2319	-43.0264
Freshwater fishes	Delturus carinotus (La Monte 1933)	-20.2172	-41.9872
Freshwater fishes	Delturus brevis (Reis & Pereira 2006)	-16.7667	-42.0333
Freshwater fishes	Rhamdia jequitinhonha Silfvergrip 1996	-16.7667	-42.0333
Freshwater fishes	Wertheimeria maculata Steindachner 1877	-16.7631	-42.0094
Freshwater fishes	Brycon zsp. 3	-16.7567	-41.9917
Freshwater fishes	Astyanax microschemos Bertaco & Lucena 2006	-20.35	-41.5167
Freshwater fishes	Simpsonichthys ocellatus Costa Nielsen & de Luca 2001	-16.5903	-41.5532
Freshwater fishes	Crenicichla mucuryna Ihering 1914	-17.8889	-41.3861
Freshwater fishes	Astyanax brevirhinus Eigenmann 1908	-16.6833	-41.3833
Freshwater fishes	Leporinus garmani Borodin 1929	-16.56	-41.483
Freshwater fishes	Brycon zsp. 2	-15.8167	-41.2167
Freshwater fishes	Astyanax pelecus Bertaco & Lucena 2006	-15.505	-41.2392
Freshwater fishes	Ituglanis parahybae (Eigenmann 1918)	-21.65	-41.0333
Freshwater fishes	Brycon ferox Steindachner 1877	-17.7	-40.9667
Freshwater fishes	Brycon vermelha Lima & Castro 1999	-17.7	-40.9667
Freshwater fishes	Microcambeva zsp. 1	-19.2333	-40.8333
Freshwater fishes	Delturus angulicauda (Steindachner 1877)	-17.9	-40.2167
Freshwater fishes	Pogonopoma wertheimeri (Steindachner 1867)	-17.9	-40.2167
Freshwater fishes	Trichomycterus pradensis Sarmento-Soares ¬´et al¬ª. 2005	-16.8361	-40.1444
Freshwater fishes	Simpsonichthys rosaceus Costa Nielsen & de Luca 2001	-15.3962	-40.0352
Freshwater fishes	Parotocinclus jimi Garavello 1977	-14.2	-39.83
Freshwater fishes	Prorivulus auriferus Costa Lima & Suzart ¬´in¬ª Costa 2004	-13.2831	-38.9817
Freshwater fishes	Hoplias brasiliensis (Spix ¬´in¬ª Spix & Agassiz 1829)	-12.59	-38.9836
Freshwater fishes	Hyphessobrycon itaparicensis Lima & Costa 2001	-13	-38.7
Freshwater fishes	Erythrinus kessleri Steindachner 1876	-12.9006	-38.4333
Freshwater fishes	Characidium bahiense Almeida 1975	-12.75	-38.3333
Freshwater fishes	Hyphessobrycon parvellus Ellis 1911	-12.4	-38.3333
Freshwater fishes	Phalloptychus eigenmanni Henn 1916	-12.4	-38.3333
Freshwater fishes	Rhamdella papariae Fowler 1941	-6.1167	-35.1667
Terrestrial vertebrates: small mammals	Brucepattersonius griserufescens	-20.5217	-41.1347
Terrestrial vertebrates: small mammals	Brucepattersonius igniventris	-24.1825	-48.2342
Terrestrial vertebrates: small mammals	Brucepattersonius igniventris	-24.5856	-48.5931
Terrestrial vertebrates: small mammals	Calomys cerqueirai	-21.4861	-41.8587
Terrestrial vertebrates: small mammals	Cavia magna	-27.7	-48.95
Terrestrial vertebrates: small mammals	Cerradomys goytaca	-22.25	-41.65
Terrestrial vertebrates: small mammals	Cerradomys goytaca	-21.7447	-41.0403
Terrestrial vertebrates: small mammals	Cerradomys goytaca	-22.0706	-41.3536
Terrestrial vertebrates: small mammals	Delomys altimontanus	-22.4853	-44.7586
Terrestrial vertebrates: small mammals	Phyllomys kerri	-23.4167	-45.1667
Terrestrial vertebrates: small mammals	Phyllomys mantiqueirensis	-22.6	-45.3333
Terrestrial vertebrates: small mammals	Trinomys paratus	-19.95	-40.5333
Terrestrial vertebrates: small mammals	Trinomys paratus	-19.95	-40.5167
Terrestrial vertebrates: small mammals	Trinomys paratus	-20.1583	-40.3144
Terrestrial vertebrates: small mammals	Trinomys paratus	-20.2667	-40.4667
Terrestrial vertebrates: small mammals	Trinomys paratus	-20.3667	-40.4917
Terrestrial vertebrates: small mammals	Trinomys paratus	-20.3722	-40.4721
Terrestrial vertebrates: small mammals	Trinomys paratus	-19.95	-40.5333
Terrestrial vertebrates: small mammals	Trinomys paratus	-20.2667	-40.4667
Terrestrial vertebrates: small mammals	Trinomys paratus	-20.3743	-40.4594
Terrestrial vertebrates: small mammals	Trinomys paratus	-20.3912	-40.4563
Terrestrial vertebrates: small mammals	Trinomys paratus	-20.3669	-40.4832
Terrestrial vertebrates: small mammals	Trinomys paratus	-20.3844	-40.4482
Terrestrial vertebrates: small mammals	Trinomys paratus	-20.3792	-40.4683
Terrestrial vertebrates: small mammals	Trinomys paratus	-20.3933	-40.4329
Terrestrial vertebrates: small mammals	Trinomys paratus	-20.3858	-40.4529
Terrestrial vertebrates: small mammals	Trinomys paratus	-19.9541	-40.5815
Terrestrial vertebrates: small mammals	Trinomys paratus	-19.9592	-40.5975
Terrestrial vertebrates: small mammals	Trinomys paratus	-19.9667	-40.5833
Terrestrial vertebrates: small mammals	Trinomys paratus	-20.2845	-40.5215
Terrestrial vertebrates: small mammals	Holochilus sciureus	-7.59083	-35.4908
Terrestrial vertebrates: small mammals	Holochilus sciureus	-8.00333	-35.0214
Terrestrial vertebrates: small mammals	Holochilus sciureus	-8.38278	-35.4528
Terrestrial vertebrates: small mammals	Holochilus sciureus	-7.59083	-35.4908
Terrestrial vertebrates: small mammals	Nectomys rattus	-7.89167	-35.1767
Terrestrial vertebrates: small mammals	Nectomys rattus	-7.93694	-35.0264
Terrestrial vertebrates: small mammals	Nectomys rattus	-7.94	-34.8722
Terrestrial vertebrates: small mammals	Nectomys rattus	-8.02028	-34.9817
Terrestrial vertebrates: small mammals	Nectomys rattus	-8.72139	-35.8436
Terrestrial vertebrates: small mammals	Oligoryzomys stramineus	-7.5186	-35.503
Terrestrial vertebrates: small mammals	Oligoryzomys stramineus	-9.1289	-36.3303
Terrestrial vertebrates: small mammals	Phyllomys blainvilii	-9.4	-36.2333
Terrestrial vertebrates: small mammals	Phyllomys unicolor	-17.8	-39.65
Terrestrial vertebrates: small mammals	Trinomys mirapitanga	-16.5167	-39.3
Terrestrial vertebrates: small mammals	Akodon lindbergh	-21.6833	-43.45
Terrestrial vertebrates: small mammals	Akodon lindbergh	-21.9636	-43.3119
Terrestrial vertebrates: small mammals	Akodon lindbergh	-21.5822	-44.5609
Terrestrial vertebrates: small mammals	Akodon mystax	-20.4667	-41.8
Terrestrial vertebrates: small mammals	Akodon mystax	-20.4436	-41.7869
Terrestrial vertebrates: small mammals	Brucepattersonius griserufescens	-20.4667	-41.8
Terrestrial vertebrates: small mammals	Brucepattersonius griserufescens	-20.4436	-41.7869
Terrestrial vertebrates: small mammals	Brucepattersonius griserufescens	-20.424	-41.8081
Terrestrial vertebrates: small mammals	Brucepattersonius griserufescens	-20.4336	-41.8678
Terrestrial vertebrates: small mammals	Calomys cerqueirai	-20.8836	-41.83
Terrestrial vertebrates: small mammals	Calomys cerqueirai	-21.0002	-44
Terrestrial vertebrates: small mammals	Calomys cerqueirai	-21.0926	-42.1177
Terrestrial vertebrates: small mammals	Calomys cerqueirai	-21.2909	-44.987
Terrestrial vertebrates: small mammals	Cavia intermedia	-27.75	-48.5333
Terrestrial vertebrates: small mammals	Cerradomys maracajuensis	-22.3333	-53.2833
Terrestrial vertebrates: small mammals	Delomys altimontanus	-20.4667	-41.8
Terrestrial vertebrates: small mammals	Delomys altimontanus	-20.4436	-41.7869
Terrestrial vertebrates: small mammals	Delomys altimontanus	-22.2667	-44.5667
Terrestrial vertebrates: small mammals	Deltamys araucaria	-29.4414	-50.3973
Terrestrial vertebrates: small mammals	Deltamys kempi	-29.3345	-49.7269
Terrestrial vertebrates: small mammals	Juliomys ximenezi	-29.16	-50.1
Terrestrial vertebrates: small mammals	Nectomys rattus	-6.74	-35.1458
Terrestrial vertebrates: small mammals	Oxymycterus caparaoe	-20.4667	-41.8
Terrestrial vertebrates: small mammals	Oxymycterus caparaoe	-20.4436	-41.7869
Terrestrial vertebrates: small mammals	Phyllomys centralis	-19.8222	-43.9128
Terrestrial vertebrates: small mammals	Phyllomys centralis	-19.9589	-43.415
Terrestrial vertebrates: small mammals	Phyllomys centralis	-20.0742	-43.3981
Terrestrial vertebrates: small mammals	Phyllomys lundi	-22.2333	-44.2
Terrestrial vertebrates: small mammals	Phyllomys thomasi	-23.8167	-45.3333
Terrestrial vertebrates: small mammals	Thrichomys apereoides	-20.099	-43.4851
Terrestrial vertebrates: small mammals	Trinomys moojeni	-20.099	-43.4851
Terrestrial vertebrates: small mammals	Trinomys paratus	-20.099	-43.4851
Angiosperms	Vernonia viminea	-24.5836	-50.0053
Angiosperms	Baccharis suberectifolia	-25.3274	-50.1107
Angiosperms	Galianthe elegans	-25.3274	-50.1107
Angiosperms	Stevia leptophylla	-25.3274	-50.1107
Angiosperms	Tibouchina goldenbergii	-25.5895	-49.7734
Angiosperms	Macroscepis hatschbachii	-25.8872	-49.5344
Angiosperms	Mimosa eurystegia	-25.8872	-49.5344
Angiosperms	Aechmea rubroaristata	-26.1514	-49.3562
Angiosperms	Nidularium catarinense	-26.1514	-49.3562
Angiosperms	Phyllanthus eremitus	-26.7305	-49.436
Angiosperms	Siphocampylus sevegnaniae	-26.7305	-49.436
Angiosperms	Solanum matadori	-27.1734	-49.5583
Angiosperms	Baccharis itapirocensis	-25.2833	-49.0163
Angiosperms	Baccharis umbellata	-25.2833	-49.0163
Angiosperms	Chaetogastra crassifolia	-25.2833	-49.0163
Angiosperms	Marsdenia hatschbachii	-25.2833	-49.0163
Angiosperms	Mimosa tucumensis	-25.2833	-49.0163
Angiosperms	Symplocos incrassata	-25.2833	-49.0163
Angiosperms	Acianthera adiri	-25.4356	-49.1559
Angiosperms	Connarus subpeltatus	-25.4356	-49.1559
Angiosperms	Eugenia brunneopubescens	-25.4356	-49.1559
Angiosperms	Jobinia hatschbachii	-25.4356	-49.1559
Angiosperms	Muellera graciliflora	-25.4356	-49.1559
Angiosperms	Pabstiella bacillaris	-25.4356	-49.1559
Angiosperms	Thismia prataensis	-25.7474	-48.8739
Angiosperms	Plantago humboldtiana	-26.4026	-49.3008
Angiosperms	Mollinedia eugeniifolia	-26.8518	-49.003
Angiosperms	Ruellia reitzii	-26.8518	-49.003
Angiosperms	Raulinoa echinata	-27.0733	-49.3245
Angiosperms	Merostachys ciliata	-27.2021	-49.103
Angiosperms	Chusquea nudiramea	-27.7293	-48.8631
Angiosperms	Aulonemia cincta	-25.2951	-48.6438
Angiosperms	Gaylussacia paranaensis	-25.2951	-48.6438
Angiosperms	Sloanea hatschbachii	-25.634	-48.596
Angiosperms	Baccharis aracatubensis	-26.0235	-48.7835
Angiosperms	Chaetogastra cristaensis	-26.0235	-48.7835
Angiosperms	Passiflora reitzii	-26.0235	-48.7835
Angiosperms	Phaeostemma hatschbachii	-26.0235	-48.7835
Angiosperms	Begonia konderreisiana	-26.3463	-48.8143
Angiosperms	Acianthera murexoidea	-27.586	-48.7282
Angiosperms	Anthurium pilonense	-27.586	-48.7282
Angiosperms	Ruellia kleinii	-27.586	-48.7282
Angiosperms	Eleocharis pseudobulbosa	-23.9727	-48.2417
Angiosperms	Quesnelia violacea	-23.9727	-48.2417
Angiosperms	Cinnamodendron occhionianum	-25.1309	-47.9671
Angiosperms	Dichorisandra interrupta	-25.1309	-47.9671
Angiosperms	Merostachys caucaiana	-23.5702	-46.9137
Angiosperms	Nidularium rolfianum	-23.9559	-47.2095
Angiosperms	Anthurium jureianum	-24.4236	-47.1551
Angiosperms	Begonia jureiensis	-24.4236	-47.1551
Angiosperms	Eugenia pithecocephala	-24.4236	-47.1551
Angiosperms	Ocotea bragai	-23.3346	-46.6839
Angiosperms	Begonia brevilobata	-23.8814	-46.3919
Angiosperms	Couepia meridionalis	-23.8814	-46.3919
Angiosperms	Nematanthus teixeiranus	-23.8814	-46.3919
Angiosperms	Ocotea basicordatifolia	-23.8814	-46.3919
Angiosperms	Ocotea inhauba	-23.8814	-46.3919
Angiosperms	Neomarica sancti-vicentei	-24.024	-46.5072
Angiosperms	Nidularium minutum	-23.7568	-46.6842
Angiosperms	Ocotea felix	-23.7568	-46.6842
Angiosperms	Polygala wettsteinii	-23.7568	-46.6842
Angiosperms	Chomelia modesta	-23.1856	-46.1245
Angiosperms	Aiouea hirsuta	-23.5607	-46.2866
Angiosperms	Anthurium victorii	-23.5607	-46.2866
Angiosperms	Begonia boraceiensis	-23.5607	-46.2866
Angiosperms	Capsicum hunzikerianum	-23.5607	-46.2866
Angiosperms	Chusquea erecta	-23.5607	-46.2866
Angiosperms	Eremocaulon setosum	-23.5607	-46.2866
Angiosperms	Merostachys scandens	-23.5607	-46.2866
Angiosperms	Miltonia kayasimae	-23.5607	-46.2866
Angiosperms	Siphocampylus lauroanus	-23.5607	-46.2866
Angiosperms	Solanum spissifolium	-23.5607	-46.2866
Angiosperms	Adenocalymma ubatubense	-23.4054	-45.337
Angiosperms	Anathallis guarujaensis	-23.4054	-45.337
Angiosperms	Anthurium unense	-23.4054	-45.337
Angiosperms	Begonia piresiana	-23.4054	-45.337
Angiosperms	Begonia rufosericea	-23.4054	-45.337
Angiosperms	Couepia leitaofilhoi	-23.4054	-45.337
Angiosperms	Coussarea bocainae	-23.4054	-45.337
Angiosperms	Eugenia longibracteata	-23.4054	-45.337
Angiosperms	Macroditassa marianae	-23.4054	-45.337
Angiosperms	Myrocarpus leprosus	-23.4054	-45.337
Angiosperms	Neoregelia paulistana	-23.4054	-45.337
Angiosperms	Peperomia guarujana	-23.4054	-45.337
Angiosperms	Philodendron simonianum	-23.4054	-45.337
Angiosperms	Sinningia globulosa	-23.4054	-45.337
Angiosperms	Sinningia insularis	-23.4054	-45.337
Angiosperms	Staurogyne rubescens	-23.4054	-45.337
Angiosperms	Aechmea paratiensis	-23.5197	-45.3608
Angiosperms	Calyptranthes curta	-23.5197	-45.3608
Angiosperms	Calyptranthes ubatubana	-23.5197	-45.3608
Angiosperms	Cybianthus membranaceus	-23.5197	-45.3608
Angiosperms	Eremanthus praetermissus	-23.5197	-45.3608
Angiosperms	Eugenia regia	-23.5197	-45.3608
Angiosperms	Eugenia sulcatifolia	-23.5197	-45.3608
Angiosperms	Meriania paratyensis	-23.5197	-45.3608
Angiosperms	Myrcia delicata	-23.5197	-45.3608
Angiosperms	Myrcia guarujana	-23.5197	-45.3608
Angiosperms	Myrcia ubatubana	-23.5197	-45.3608
Angiosperms	Neoregelia paratiensis	-23.5197	-45.3608
Angiosperms	Sorocea carautana	-23.5197	-45.3608
Angiosperms	Stylogyne carautae	-23.5197	-45.3608
Angiosperms	Symplocos atlantica	-23.5197	-45.3608
Angiosperms	Adenocalymma bullatum	-22.7118	-44.9166
Angiosperms	Anthurium ameliae	-22.7118	-44.9166
Angiosperms	Anthurium bocainense	-22.7118	-44.9166
Angiosperms	Anthurium bragae	-22.7118	-44.9166
Angiosperms	Anthurium tomasiae	-22.7118	-44.9166
Angiosperms	Aphelandra bradeana	-22.7118	-44.9166
Angiosperms	Aureliana anonacea	-22.7118	-44.9166
Angiosperms	Baccharis macrophylla	-22.7118	-44.9166
Angiosperms	Baccharis maxima	-22.7118	-44.9166
Angiosperms	Begonia lanstyakii	-22.7118	-44.9166
Angiosperms	Buddleja speciosissima	-22.7118	-44.9166
Angiosperms	Chionolaena juniperina	-22.7118	-44.9166
Angiosperms	Chionolaena wittigiana	-22.7118	-44.9166
Angiosperms	Dorstenia stellaris	-22.7118	-44.9166
Angiosperms	Esterhazya eitenorum	-22.7118	-44.9166
Angiosperms	Fernseea bocainensis	-22.7118	-44.9166
Angiosperms	Graphistylis toledoi	-22.7118	-44.9166
Angiosperms	Herpetacanthus parvispica	-22.7118	-44.9166
Angiosperms	Heteropterys occhionii	-22.7118	-44.9166
Angiosperms	Hindsia glabra	-22.7118	-44.9166
Angiosperms	Jacaranda crassifolia	-22.7118	-44.9166
Angiosperms	Lamanonia chabertii	-22.7118	-44.9166
Angiosperms	Leiothrix argyroderma	-22.7118	-44.9166
Angiosperms	Manettia pauciflora	-22.7118	-44.9166
Angiosperms	Meliosma itatiaiae	-22.7118	-44.9166
Angiosperms	Nidularium apiculatum	-22.7118	-44.9166
Angiosperms	Nidularium corallinum	-22.7118	-44.9166
Angiosperms	Nidularium itatiaiae	-22.7118	-44.9166
Angiosperms	Ocotea mantiqueirae	-22.7118	-44.9166
Angiosperms	Octomeria itatiaiae	-22.7118	-44.9166
Angiosperms	Oxalis arachnoidea	-22.7118	-44.9166
Angiosperms	Oxypetalum costae	-22.7118	-44.9166
Angiosperms	Passiflora marginata	-22.7118	-44.9166
Angiosperms	Sinningia glazioviana	-22.7118	-44.9166
Angiosperms	Specklinia leucosepala	-22.7118	-44.9166
Angiosperms	Staurogyne itatiaiae	-22.7118	-44.9166
Angiosperms	Swartzia submontana	-22.7118	-44.9166
Angiosperms	Triuris alata	-22.7118	-44.9166
Angiosperms	Aphelandra paulensis	-23.0653	-45.0886
Angiosperms	Dendropanax denticulatus	-23.0653	-45.0886
Angiosperms	Macrocarpaea inesiae	-23.0653	-45.0886
Angiosperms	Myrcia longipaniculata	-23.0653	-45.0886
Angiosperms	Oxypetalum gyrophyllum	-23.0653	-45.0886
Angiosperms	Lessingianthus foliosus	-22.8805	-44.6165
Angiosperms	Phaeostemma brasiliensis	-22.8805	-44.6165
Angiosperms	Polygala bocainensis	-22.8805	-44.6165
Angiosperms	Begonia rubropilosa	-22.8422	-44.0215
Angiosperms	Nidularium mangaratibense	-22.8422	-44.0215
Angiosperms	Piper emygdioi	-22.8422	-44.0215
Angiosperms	Calyptranthes arachnicola	-22.8836	-44.1231
Angiosperms	Eugenia marambaiensis	-22.8836	-44.1231
Angiosperms	Neomarica mauroi	-22.8836	-44.1231
Angiosperms	Sinningia muscicola	-22.8836	-44.1231
Angiosperms	Beilschmiedia stricta	-22.2847	-43.502
Angiosperms	Miconia elaeodendron	-22.5197	-43.5149
Angiosperms	Calathea dryadica	-22.6508	-43.3884
Angiosperms	Simira pikia	-22.6508	-43.3884
Angiosperms	Sinningia helleri	-22.6508	-43.3884
Angiosperms	Symplocos occulta	-22.6508	-43.3884
Angiosperms	Anathallis githaginea	-22.9086	-43.4537
Angiosperms	Anthurium lucidum	-22.9086	-43.4537
Angiosperms	Antidaphne schottii	-22.9086	-43.4537
Angiosperms	Barbacenia gaveensis	-22.9086	-43.4537
Angiosperms	Begonia aconitifolia	-22.9086	-43.4537
Angiosperms	Callisthene dryadum	-22.9086	-43.4537
Angiosperms	Capsicum friburgense	-22.9086	-43.4537
Angiosperms	Chionanthus fluminensis	-22.9086	-43.4537
Angiosperms	Chionanthus tenuis	-22.9086	-43.4537
Angiosperms	Conchocarpus sordidus	-22.9086	-43.4537
Angiosperms	Connarus marginatus	-22.9086	-43.4537
Angiosperms	Couratari pyramidata	-22.9086	-43.4537
Angiosperms	Coussarea coffeoides	-22.9086	-43.4537
Angiosperms	Cryptanthus bromelioides	-22.9086	-43.4537
Angiosperms	Ditassa subumbellata	-22.9086	-43.4537
Angiosperms	Eschweilera compressa	-22.9086	-43.4537
Angiosperms	Eugenia grandifolia	-22.9086	-43.4537
Angiosperms	Gonolobus dorothyanus	-22.9086	-43.4537
Angiosperms	Herpetacanthus delicatus	-22.9086	-43.4537
Angiosperms	Ildefonsia bibracteata	-22.9086	-43.4537
Angiosperms	Monsanima tinguaensis	-22.9086	-43.4537
Angiosperms	Monteverdia basidentata	-22.9086	-43.4537
Angiosperms	Nidularium utriculosum	-22.9086	-43.4537
Angiosperms	Octomeria minuta	-22.9086	-43.4537
Angiosperms	Piper lundii	-22.9086	-43.4537
Angiosperms	Piper translucens	-22.9086	-43.4537
Angiosperms	Siderasis fuscata	-22.9086	-43.4537
Angiosperms	Tetragastris breviacuminata	-22.9086	-43.4537
Angiosperms	Justicia paracambi	-22.6858	-43.8145
Angiosperms	Schaueria thyrsiflora	-22.6858	-43.8145
Angiosperms	Adenocalymma cauliflorum	-22.3241	-43.0531
Angiosperms	Aechmea lilacinantha	-22.3241	-43.0531
Angiosperms	Alcantarea martinellii	-22.3241	-43.0531
Angiosperms	Anathallis pubipetala	-22.3241	-43.0531
Angiosperms	Anathallis spannageliana	-22.3241	-43.0531
Angiosperms	Baccharis ciliata	-22.3241	-43.0531
Angiosperms	Baccharis pseudovaccinioides	-22.3241	-43.0531
Angiosperms	Begonia lubbersii	-22.3241	-43.0531
Angiosperms	Campomanesia hirsuta	-22.3241	-43.0531
Angiosperms	Cattleya acuensis	-22.3241	-43.0531
Angiosperms	Cinnamodendron sampaioanum	-22.3241	-43.0531
Angiosperms	Couepia parvifolia	-22.3241	-43.0531
Angiosperms	Dendropanax trilobus	-22.3241	-43.0531
Angiosperms	Dioscorea sphaeroidea	-22.3241	-43.0531
Angiosperms	Galianthe polygonoides	-22.3241	-43.0531
Angiosperms	Graphistylis cuneifolia	-22.3241	-43.0531
Angiosperms	Hindsia ramosissima	-22.3241	-43.0531
Angiosperms	Magdalenaea limae	-22.3241	-43.0531
Angiosperms	Manettia gehtii	-22.3241	-43.0531
Angiosperms	Mesosphaerum cymulosum	-22.3241	-43.0531
Angiosperms	Mezilaurus navalium	-22.3241	-43.0531
Angiosperms	Neoregelia longipedicellata	-22.3241	-43.0531
Angiosperms	Peperomia arbuscula	-22.3241	-43.0531
Angiosperms	Peperomia bradei	-22.3241	-43.0531
Angiosperms	Piper rioense	-22.3241	-43.0531
Angiosperms	Piper saldanhai	-22.3241	-43.0531
Angiosperms	Pleiochiton glaziovianum	-22.3241	-43.0531
Angiosperms	Simira walteri	-22.3241	-43.0531
Angiosperms	Sinningia cardinalis	-22.3241	-43.0531
Angiosperms	Sinningia cochlearis	-22.3241	-43.0531
Angiosperms	Specklinia spathuliglossa	-22.3241	-43.0531
Angiosperms	Stevia organensis	-22.3241	-43.0531
Angiosperms	Stylogyne araujoana	-22.3241	-43.0531
Angiosperms	Stylogyne sordida	-22.3241	-43.0531
Angiosperms	Tillandsia grazielae	-22.3241	-43.0531
Angiosperms	Tillandsia organensis	-22.3241	-43.0531
Angiosperms	Tillandsia reclinata	-22.3241	-43.0531
Angiosperms	Trilepis tenuis	-22.3241	-43.0531
Angiosperms	Vriesea microrachis	-22.3241	-43.0531
Angiosperms	Vriesea teresopolitana	-22.3241	-43.0531
Angiosperms	Bertolonia organensis	-22.6172	-43.1749
Angiosperms	Nidularium altimontanum	-22.6172	-43.1749
Angiosperms	Pouteria stenophylla	-22.6172	-43.1749
Angiosperms	Anthurium polynervium	-22.0658	-42.7044
Angiosperms	Peperomia humifusa	-22.0658	-42.7044
Angiosperms	Abatia microphylla	-22.3055	-42.5556
Angiosperms	Aniba pedicellata	-22.3055	-42.5556
Angiosperms	Cathedra grandiflora	-22.3055	-42.5556
Angiosperms	Dahlstedtia glaziovii	-22.3055	-42.5556
Angiosperms	Justicia nervata	-22.3055	-42.5556
Angiosperms	Machaerium macaense	-22.3055	-42.5556
Angiosperms	Mollinedia longicuspidata	-22.3055	-42.5556
Angiosperms	Mollinedia myriantha	-22.3055	-42.5556
Angiosperms	Ocotea schwackeana	-22.3055	-42.5556
Angiosperms	Oxypetalum lutescens	-22.3055	-42.5556
Angiosperms	Pabstiella fluminensis	-22.3055	-42.5556
Angiosperms	Peltophyllum caudatum	-22.3055	-42.5556
Angiosperms	Pleiochiton micranthum	-22.3055	-42.5556
Angiosperms	Pleiochiton parvifolium	-22.3055	-42.5556
Angiosperms	Solanum friburgense	-22.3055	-42.5556
Angiosperms	Symplocos altissima	-22.3055	-42.5556
Angiosperms	Symplocos glaziovii	-22.3055	-42.5556
Angiosperms	Symplocos organensis	-22.3055	-42.5556
Angiosperms	Tachigali beaurepairei	-22.3055	-42.5556
Angiosperms	Thismia caudata	-22.3055	-42.5556
Angiosperms	Thismia fungiformis	-22.3055	-42.5556
Angiosperms	Thismia macahensis	-22.3055	-42.5556
Angiosperms	Vriesea nubicola	-22.2773	-42.6317
Angiosperms	Baccharis friburgensis	-22.383	-42.4302
Angiosperms	Coussarea friburgensis	-22.383	-42.4302
Angiosperms	Coussarea speciosa	-22.383	-42.4302
Angiosperms	Gomesa pulchella	-22.383	-42.4302
Angiosperms	Manettia parvula	-22.383	-42.4302
Angiosperms	Vanhouttea fruticulosa	-22.383	-42.4302
Angiosperms	Philodendron luisae	-22.5451	-42.4511
Angiosperms	Almeidea limae	-22.5303	-42.8055
Angiosperms	Anthurium cronembergerae	-22.5303	-42.8055
Angiosperms	Bathysa sylvestrae	-22.5303	-42.8055
Angiosperms	Begonia edmundoi	-22.5303	-42.8055
Angiosperms	Begonia lunaris	-22.5303	-42.8055
Angiosperms	Calyptranthes biconvexa	-22.5303	-42.8055
Angiosperms	Hiraea occhionii	-22.5303	-42.8055
Angiosperms	Octomeria multiflora	-22.5303	-42.8055
Angiosperms	Polygala revoluta	-22.5303	-42.8055
Angiosperms	Sorocea angustifolia	-22.5303	-42.8055
Angiosperms	Urbanodendron macrophyllum	-22.7471	-42.4706
Angiosperms	Achetaria latifolia	-22.8923	-42.5753
Angiosperms	Dichorisandra fluminensis	-22.8923	-42.5753
Angiosperms	Ditassa maricaensis	-22.8923	-42.5753
Angiosperms	Eugenia farneyi	-22.8923	-42.5753
Angiosperms	Eugenia gastropogena	-22.8923	-42.5753
Angiosperms	Goeppertia dorothyae	-22.8923	-42.5753
Angiosperms	Janusia diminuta	-22.8923	-42.5753
Angiosperms	Nidularium atalaiense	-22.8923	-42.5753
Angiosperms	Passiflora farneyi	-22.8923	-42.5753
Angiosperms	Philodendron nadruzianum	-22.8923	-42.5753
Angiosperms	Pilea carautae	-22.8923	-42.5753
Angiosperms	Serjania littoralis	-22.8923	-42.5753
Angiosperms	Struthanthus armandianus	-22.8923	-42.5753
Angiosperms	Struthanthus maricensis	-22.8923	-42.5753
Angiosperms	Strychnos jacarepiensis	-22.8923	-42.5753
Angiosperms	Neoregelia ilhana	-21.8104	-41.9454
Angiosperms	Neoregelia watersiana	-21.8104	-41.9454
Angiosperms	Alcantarea farneyi	-21.9248	-41.969
Angiosperms	Barbacenia fanniae	-21.9248	-41.969
Angiosperms	Miconia bradeana	-21.9248	-41.969
Angiosperms	Neoregelia desenganensis	-21.9248	-41.969
Angiosperms	Phymatidium limae	-21.9248	-41.969
Angiosperms	Pleiochiton longipetiolatum	-21.9248	-41.969
Angiosperms	Pleiochiton magdalenense	-21.9248	-41.969
Angiosperms	Prepusa alata	-21.9248	-41.969
Angiosperms	Senaea janeirensis	-21.9248	-41.969
Angiosperms	Siderasis spectabilis	-21.9248	-41.969
Angiosperms	Myrcia exapata	-22.0741	-42.1899
Angiosperms	Banisteriopsis magdalenensis	-21.959	-41.8417
Angiosperms	Peltogyne mattosiana	-21.959	-41.8417
Angiosperms	Aphelandra stephanophysa	-22.3104	-41.8484
Angiosperms	Barbosella macaheensis	-22.3104	-41.8484
Angiosperms	Dorstenia fischeri	-22.3104	-41.8484
Angiosperms	Struthanthus dorothyi	-22.3104	-41.8484
Angiosperms	Behuria lumiarensis	-22.3743	-42.2666
Angiosperms	Dichorisandra odorata	-22.4171	-41.9495
Angiosperms	Poecilanthe fluminensis	-22.4662	-41.9581
Angiosperms	Strychnos dantaensis	-22.4942	-42.2534
Angiosperms	Begonia pachypoda	-20.7513	-41.3962
Angiosperms	Eremitis afimbriata	-20.7513	-41.3962
Angiosperms	Conchocarpus furcatus	-21.0147	-41.4182
Angiosperms	Dorstenia albertorum	-21.0147	-41.4182
Angiosperms	Neoregelia dayvidiana	-21.0147	-41.4182
Angiosperms	Pitcairnia abyssicola	-21.0147	-41.4182
Angiosperms	Stigmaphyllon carautae	-21.0865	-41.6156
Angiosperms	Trigynaea flagelliflora	-21.0865	-41.6156
Angiosperms	Amorimia tumida	-21.3882	-41.7571
Angiosperms	Eugenia trichogyna	-21.3882	-41.7571
Angiosperms	Hippeastrum idimae	-21.3882	-41.7571
Angiosperms	Hindsia republicana	-21.8308	-41.7731
Angiosperms	Rhipsalis flagelliformis	-21.8308	-41.7731
Angiosperms	Dorstenia conceptionis	-19.8301	-40.8765
Angiosperms	Thismia espirito-santensis	-19.8301	-40.8765
Angiosperms	Pitcairnia diversifolia	-19.9598	-41.0584
Angiosperms	Anathallis kautskyi	-20.2958	-40.8378
Angiosperms	Barbosella spiritu-sanctensis	-20.2958	-40.8378
Angiosperms	Begonia bullatifolia	-20.2958	-40.8378
Angiosperms	Brasiliorchis kautskyi	-20.2958	-40.8378
Angiosperms	Dorstenia hildegardis	-20.2958	-40.8378
Angiosperms	Dryadella crenulata	-20.2958	-40.8378
Angiosperms	Dryadella espirito-santensis	-20.2958	-40.8378
Angiosperms	Gomesa damacenoi	-20.2958	-40.8378
Angiosperms	Gomesa kautskyi	-20.2958	-40.8378
Angiosperms	Gomesa uhlii	-20.2958	-40.8378
Angiosperms	Gomesa velteniana	-20.2958	-40.8378
Angiosperms	Neoregelia diversifolia	-20.2958	-40.8378
Angiosperms	Philodendron longilobatum	-20.2958	-40.8378
Angiosperms	Rhipsalis hoelleri	-20.2958	-40.8378
Angiosperms	Sinningia kautskyi	-20.2958	-40.8378
Angiosperms	Turnera hatschbachii	-20.2958	-40.8378
Angiosperms	Anthurium fragae	-20.4895	-41.1863
Angiosperms	Dryadella susanae	-20.4895	-41.1863
Angiosperms	Lecosia oppositifolia	-20.4895	-41.1863
Angiosperms	Neoregelia inexspectata	-20.4895	-41.1863
Angiosperms	Pabstiella castellensis	-20.4895	-41.1863
Angiosperms	Rudgea axilliflora	-20.4895	-41.1863
Angiosperms	Rudgea quisquiliae	-20.4895	-41.1863
Angiosperms	Stigmaphyllon glabrum	-20.4895	-41.1863
Angiosperms	Tibouchina tedescoi	-20.4895	-41.1863
Angiosperms	Tillandsia castelensis	-20.4895	-41.1863
Angiosperms	Anthurium macropodum	-20.7982	-40.9077
Angiosperms	Paepalanthus capixaba	-20.7982	-40.9077
Angiosperms	Piper aghaense	-20.7982	-40.9077
Angiosperms	Dorstenia romaniucii	-20.9713	-41.1854
Angiosperms	Neoregelia dactyloflammans	-20.9713	-41.1854
Angiosperms	Anthurium cachoeirense	-20.8585	-41.0894
Angiosperms	Dichorisandra neglecta	-20.8585	-41.0894
Angiosperms	Ditassa duartei	-20.8585	-41.0894
Angiosperms	Besleria aurea	-21.7539	-41.2686
Angiosperms	Eriotheca saxicola	-19.5053	-40.5248
Angiosperms	Kielmeyera rufotomentosa	-19.4798	-40.6169
Angiosperms	Cryptanthus giganteus	-19.7012	-40.6025
Angiosperms	Dyckia espiritosantensis	-19.7179	-40.7406
Angiosperms	Luxemburgia mysteriosa	-19.7129	-40.6596
Angiosperms	Merianthera verrucosa	-19.7129	-40.6596
Angiosperms	Cryptanthus capitellatus	-19.792	-40.6758
Angiosperms	Matelea demuneri	-19.792	-40.6758
Angiosperms	Myrcia teresensis	-19.8706	-40.6223
Angiosperms	Conchocarpus minutiflorus	-19.8975	-40.7361
Angiosperms	Orthophytum pseudostoloniferum	-19.8975	-40.7361
Angiosperms	Prepusa dibotrya	-19.8975	-40.7361
Angiosperms	Scleria chasmema	-19.8975	-40.7361
Angiosperms	Cryptanthus aracruzensis	-19.8468	-40.3644
Angiosperms	Guatteria emarginata	-19.8468	-40.3644
Angiosperms	Aechmea hostilis	-19.9606	-40.4412
Angiosperms	Anthurium gomesianum	-19.9606	-40.4412
Angiosperms	Aphelandra grazielae	-19.9606	-40.4412
Angiosperms	Aphelandra hymenobracteata	-19.9606	-40.4412
Angiosperms	Aphelandra margaritae	-19.9606	-40.4412
Angiosperms	Calyptranthes santalucia	-19.9606	-40.4412
Angiosperms	Cryptanthus rigidifolius	-19.9606	-40.4412
Angiosperms	Cryptanthus sanctaluciae	-19.9606	-40.4412
Angiosperms	Ditassa oberdanii	-19.9606	-40.4412
Angiosperms	Elvasia capixaba	-19.9606	-40.4412
Angiosperms	Elvasia kollmannii	-19.9606	-40.4412
Angiosperms	Eugenia crassa	-19.9606	-40.4412
Angiosperms	Eugenia valsuganana	-19.9606	-40.4412
Angiosperms	Ixora grazielae	-19.9606	-40.4412
Angiosperms	Leandra cristata	-19.9606	-40.4412
Angiosperms	Leandra reptans	-19.9606	-40.4412
Angiosperms	Leandra triantha	-19.9606	-40.4412
Angiosperms	Mezilaurus glabriantha	-19.9606	-40.4412
Angiosperms	Miconia capixaba	-19.9606	-40.4412
Angiosperms	Miconia michelangeliana	-19.9606	-40.4412
Angiosperms	Myrcia aurea	-19.9606	-40.4412
Angiosperms	Myrcia basicordata	-19.9606	-40.4412
Angiosperms	Myrcia crassa	-19.9606	-40.4412
Angiosperms	Myrcia curtipendula	-19.9606	-40.4412
Angiosperms	Myrcia fria	-19.9606	-40.4412
Angiosperms	Myrcia ruschii	-19.9606	-40.4412
Angiosperms	Myrcia santateresana	-19.9606	-40.4412
Angiosperms	Oxalis kollmannii	-19.9606	-40.4412
Angiosperms	Pariana multiflora	-19.9606	-40.4412
Angiosperms	Pouteria samborae	-19.9606	-40.4412
Angiosperms	Pseudolaelia canaanensis	-19.9606	-40.4412
Angiosperms	Psittacanthus tenellus	-19.9606	-40.4412
Angiosperms	Salacia nemorosa	-19.9606	-40.4412
Angiosperms	Schefflera ruschiana	-19.9606	-40.4412
Angiosperms	Siderasis albofasciata	-19.9606	-40.4412
Angiosperms	Sinningia helioana	-19.9606	-40.4412
Angiosperms	Specklinia ruschii	-19.9606	-40.4412
Angiosperms	Staurogyne parva	-19.9606	-40.4412
Angiosperms	Stigmaphyllon lanceolatum	-19.9606	-40.4412
Angiosperms	Stigmatodon sanctateresensis	-19.9606	-40.4412
Angiosperms	Vriesea pulchra	-19.9606	-40.4412
Angiosperms	Williamodendron cinnamomeum	-19.9606	-40.4412
Angiosperms	Piper delirioi	-20.0329	-40.7092
Angiosperms	Schefflera racemifera	-20.0329	-40.7092
Angiosperms	Behuria mestrealvarensis	-20.2532	-40.3536
Angiosperms	Aechmea prasinata	-20.2432	-40.4537
Angiosperms	Elvasia gigantifolia	-20.2432	-40.4537
Angiosperms	Eugenia amorimii	-20.2432	-40.4537
Angiosperms	Hypolytrum amorimii	-20.2432	-40.4537
Angiosperms	Hypolytrum espiritosantanse	-20.2432	-40.4537
Angiosperms	Leandra magnipetala	-20.2432	-40.4537
Angiosperms	Schefflera capixaba	-20.2432	-40.4537
Angiosperms	Begonia leopoldinensis	-20.1426	-40.4028
Angiosperms	Brasiliorchis schunkeana	-20.1022	-40.5423
Angiosperms	Cattleya praestans	-20.1022	-40.5423
Angiosperms	Pavonia teresina	-20.1022	-40.5423
Angiosperms	Philodendron bernardopazii	-20.1022	-40.5423
Angiosperms	Myrcia parca	-20.3635	-40.498
Angiosperms	Myoxanthus seidelii	-20.4417	-40.8346
Angiosperms	Solanum igniferum	-20.4417	-40.8346
Angiosperms	Tillandsia kautskyi	-20.4417	-40.8346
Angiosperms	Galipea carinata	-20.5407	-40.4479
Angiosperms	Swartzia capixabensis	-20.5407	-40.4479
Angiosperms	Alcantarea galactea	-20.6012	-40.7668
Angiosperms	Pitcairnia capixaba	-20.6012	-40.7668
Angiosperms	Campomanesia macrobracteolata	-20.9191	-40.799
Angiosperms	Anthurium viridivinosum	-19.8581	-40.1672
Angiosperms	Cryptanthus capitatus	-19.8581	-40.1672
Angiosperms	Anthurium angustifolium	-20.1051	-40.28
Angiosperms	Begonia espiritosantensis	-20.1051	-40.28
Angiosperms	Spirabutilon citrinum	-20.1051	-40.28
Angiosperms	Stigmatodon multifoliatus	-20.1051	-40.28
Angiosperms	Fuirena lainzii	-9.02568	-36.4468
Angiosperms	Eugenia culicina	-8.73474	-35.9361
Angiosperms	Eugenia submontana	-8.73474	-35.9361
Angiosperms	Neoregelia pernambucana	-8.73474	-35.9361
Angiosperms	Myrciaria alagoana	-9.65402	-36.259
Angiosperms	Diospyros serrana	-7.63871	-35.3111
Angiosperms	Sida pernambucensis	-7.89896	-34.9218
Angiosperms	Aphelandra nuda	-8.01249	-34.9846
Angiosperms	Dichorisandra sagittata	-8.01249	-34.9846
Angiosperms	Griffinia alba	-8.01249	-34.9846
Angiosperms	Turnera pernambucensis	-8.01249	-34.9846
Angiosperms	Calliandra duckei	-7.96713	-35.3326
Angiosperms	Cryptanthus burle-marxii	-7.96713	-35.3326
Angiosperms	Aechmea mulfordii	-8.25863	-35.145
Angiosperms	Specklinia gomesferreirae	-8.37354	-35.1815
Angiosperms	Guettarda paludosa	-17.4141	-39.8546
Angiosperms	Ormosia limae	-17.4141	-39.8546
Angiosperms	Erythroxylum santosii	-17.6618	-39.8464
Angiosperms	Eugenia itaunensis	-18.6909	-39.9417
Angiosperms	Aiouea baitelloanum	-19.0711	-40.0589
Angiosperms	Aphelandra espirito-santensis	-19.0711	-40.0589
Angiosperms	Aristolochia subglobosa	-19.0711	-40.0589
Angiosperms	Chrysophyllum pubipetalum	-19.0711	-40.0589
Angiosperms	Couepia carautae	-19.0711	-40.0589
Angiosperms	Dinizia jueirana-facao	-19.0711	-40.0589
Angiosperms	Erisma arietinum	-19.0711	-40.0589
Angiosperms	Erisma silvae	-19.0711	-40.0589
Angiosperms	Licania arianeae	-19.0711	-40.0589
Angiosperms	Salacia krigsneri	-19.0711	-40.0589
Angiosperms	Scleria rubrostriata	-19.0711	-40.0589
Angiosperms	Simira eliezeriana	-19.0711	-40.0589
Angiosperms	Simira robusta	-19.0711	-40.0589
Angiosperms	Anthurium queirozianum	-19.2124	-40.2037
Angiosperms	Anthurium ribeiroi	-19.2124	-40.2037
Angiosperms	Anthurium riodocense	-19.2124	-40.2037
Angiosperms	Anthurium siqueirae	-19.2124	-40.2037
Angiosperms	Anthurium zeneidae	-19.2124	-40.2037
Angiosperms	Atractantha shepherdiana	-19.2124	-40.2037
Angiosperms	Conchocarpus marginatus	-19.2124	-40.2037
Angiosperms	Couratari asterotricha	-19.2124	-40.2037
Angiosperms	Dorstenia gracilis	-19.2124	-40.2037
Angiosperms	Eugenia capixaba	-19.2124	-40.2037
Angiosperms	Eugenia cataphyllea	-19.2124	-40.2037
Angiosperms	Exellodendron gracile	-19.2124	-40.2037
Angiosperms	Hirtella parviunguis	-19.2124	-40.2037
Angiosperms	Monotagma grallatum	-19.2124	-40.2037
Angiosperms	Myrcia gilsoniana	-19.2124	-40.2037
Angiosperms	Oxalis doceana	-19.2124	-40.2037
Angiosperms	Oxandra unibracteata	-19.2124	-40.2037
Angiosperms	Philodendron follii	-19.2124	-40.2037
Angiosperms	Spiranthera atlantica	-19.2124	-40.2037
Angiosperms	Tynanthus espiritosantensis	-19.2124	-40.2037
Angiosperms	Physeterostemon thomasii	-13.3801	-39.341
Angiosperms	Hohenbergia barbarespina	-13.6901	-39.6376
Angiosperms	Huberia sessilifolia	-13.6901	-39.6376
Angiosperms	Meriania inflata	-13.6901	-39.6376
Angiosperms	Myrcia petrophila	-13.6901	-39.6376
Angiosperms	Myrcia thomasii	-13.6901	-39.6376
Angiosperms	Nematanthus exsertus	-13.6901	-39.6376
Angiosperms	Oxypetalum laciniatum	-13.6901	-39.6376
Angiosperms	Physeterostemon aonae	-13.6901	-39.6376
Angiosperms	Pavonia pilifera	-14.0318	-39.4369
Angiosperms	Pouteria trifida	-14.4252	-39.3359
Angiosperms	Conchocarpus modestus	-14.4173	-39.4207
Angiosperms	Hohenbergia brachycephala	-14.4448	-39.5132
Angiosperms	Eschweilera mattos-silvae	-14.626	-39.3684
Angiosperms	Mendoncia blanchetiana	-14.626	-39.3684
Angiosperms	Clusia heterocolorata	-14.6739	-39.5855
Angiosperms	Dichorisandra variegata	-14.6739	-39.5855
Angiosperms	Neoraputia micrantha	-14.6739	-39.5855
Angiosperms	Macrocarpaea orbiculata	-14.8609	-39.7229
Angiosperms	Moldenhawera intermedia	-14.8609	-39.7229
Angiosperms	Anthurium molle	-15.0639	-39.6402
Angiosperms	Anthurium teimosoanum	-15.0639	-39.6402
Angiosperms	Colicodendron martianum	-15.0639	-39.6402
Angiosperms	Conchocarpus inopinatus	-15.0639	-39.6402
Angiosperms	Conchocarpus punctatus	-15.0639	-39.6402
Angiosperms	Dichorisandra jardimii	-15.0639	-39.6402
Angiosperms	Handroanthus parviflorus	-15.0639	-39.6402
Angiosperms	Myrcia teimosa	-15.0639	-39.6402
Angiosperms	Neoraputia calliantha	-15.0639	-39.6402
Angiosperms	Quesnelia alborosea	-15.0639	-39.6402
Angiosperms	Schaueria pyramidalis	-15.0639	-39.6402
Angiosperms	Trichilia florbranca	-15.0639	-39.6402
Angiosperms	Bromelia amplifolia	-15.5346	-39.7371
Angiosperms	Chusquea clemirae	-15.5346	-39.7371
Angiosperms	Cryptanthus colnagoi	-15.5346	-39.7371
Angiosperms	Myrcia serrana	-15.5346	-39.7371
Angiosperms	Neoregelia azevedoi	-15.5346	-39.7371
Angiosperms	Pleiochiton amorimii	-15.5346	-39.7371
Angiosperms	Quesnelia koltesii	-15.5346	-39.7371
Angiosperms	Renvoizea restingae	-15.5346	-39.7371
Angiosperms	Sorocea longipedicellata	-15.5346	-39.7371
Angiosperms	Dichorisandra subtilis	-16.5927	-39.6096
Angiosperms	Amorimia andersonii	-16.9333	-39.551
Angiosperms	Dichorisandra marantoides	-16.9333	-39.551
Angiosperms	Eugenia rara	-16.9333	-39.551
Angiosperms	Hohenbergia itamarajuensis	-16.9333	-39.551
Angiosperms	Aechmea limae	-13.7592	-39.1696
Angiosperms	Aechmea pendulispica	-13.7592	-39.1696
Angiosperms	Phyllanthus longipedicellatus	-13.7592	-39.1696
Angiosperms	Cryptanthus walkerianus	-13.8664	-39.1362
Angiosperms	Passiflora igrapiunensis	-13.8664	-39.1362
Angiosperms	Myrcia raminfinita	-13.9644	-39.0766
Angiosperms	Couepia coarctata	-14.1211	-39.1006
Angiosperms	Manilkara decrescens	-14.1211	-39.1006
Angiosperms	Duguetia restingae	-14.1133	-38.9834
Angiosperms	Kielmeyera marauensis	-14.1133	-38.9834
Angiosperms	Posoqueria bahiensis	-14.1133	-38.9834
Angiosperms	Swartzia pinheiroana	-14.1133	-38.9834
Angiosperms	Kielmeyera itacarensis	-14.2332	-39.0172
Angiosperms	Ouratea platicaulis	-14.2332	-39.0172
Angiosperms	Bunchosia itacarensis	-14.3409	-39.1082
Angiosperms	Canavalia dolichothyrsa	-14.3409	-39.1082
Angiosperms	Couepia longipetiolata	-14.3409	-39.1082
Angiosperms	Diospyros ubaita	-14.3409	-39.1082
Angiosperms	Diplopterys carvalhoi	-14.3409	-39.1082
Angiosperms	Erythroxylum riparium	-14.3346	-39.036
Angiosperms	Myrcia pulvinata	-14.3346	-39.036
Angiosperms	Tovomita megantha	-14.3346	-39.036
Angiosperms	Tapura martiniae	-14.3793	-39.0209
Angiosperms	Eugenia serraegrandis	-14.4345	-39.0859
Angiosperms	Pavonia macrobracteolata	-14.4345	-39.0859
Angiosperms	Physeterostemon fiaschii	-14.4739	-39.0783
Angiosperms	Guarea anomala	-14.7823	-39.0563
Angiosperms	Herpetacanthus strongyloides	-14.7172	-39.1066
Angiosperms	Ocotea sperata	-14.7172	-39.1066
Angiosperms	Cattleya marcaliana	-14.9409	-39.2314
Angiosperms	Hohenbergia hatscbachii	-14.9409	-39.2314
Angiosperms	Zygostates cornigera	-14.9409	-39.2314
Angiosperms	Aechmea viridipetala	-14.8215	-39.2798
Angiosperms	Andreadoxa flava	-14.8215	-39.2798
Angiosperms	Aphelandra phrynioides	-14.8215	-39.2798
Angiosperms	Chromolucuma apiculata	-14.8215	-39.2798
Angiosperms	Conchocarpus dasyanthus	-14.8215	-39.2798
Angiosperms	Conchocarpus hirsutus	-14.8215	-39.2798
Angiosperms	Gymnospora blanchetii	-14.8215	-39.2798
Angiosperms	Licania bahiensis	-14.8215	-39.2798
Angiosperms	Macrocarpaea atlantica	-14.8215	-39.2798
Angiosperms	Malmea obovata	-14.8215	-39.2798
Angiosperms	Merostachys magnispicula	-14.8215	-39.2798
Angiosperms	Oxalis alvimii	-14.8215	-39.2798
Angiosperms	Piper rarum	-14.8215	-39.2798
Angiosperms	Plinia rara	-14.8215	-39.2798
Angiosperms	Solanum santosii	-14.8215	-39.2798
Angiosperms	Swartzia curranii	-14.8215	-39.2798
Angiosperms	Alvimia auriculata	-14.9268	-39.0704
Angiosperms	Conchocarpus concinnus	-14.9268	-39.0704
Angiosperms	Aechmea nigribracteata	-15.128	-39.1261
Angiosperms	Canistrum camacaense	-15.128	-39.1261
Angiosperms	Canistrum montanum	-15.128	-39.1261
Angiosperms	Diospyros amabi	-15.128	-39.1261
Angiosperms	Eremocaulon asymmetricum	-15.128	-39.1261
Angiosperms	Ichnanthus robustus	-15.128	-39.1261
Angiosperms	Kielmeyera ferruginosa	-15.128	-39.1261
Angiosperms	Myrcia cataphyllata	-15.128	-39.1261
Angiosperms	Myrcia marianae	-15.128	-39.1261
Angiosperms	Myrcia monoclada	-15.128	-39.1261
Angiosperms	Neoregelia kerryi	-15.128	-39.1261
Angiosperms	Nidularium amorimii	-15.128	-39.1261
Angiosperms	Oxalis bela-vitoriae	-15.128	-39.1261
Angiosperms	Solanum cordioides	-15.128	-39.1261
Angiosperms	Pavonia paucidentata	-15.3925	-39.2427
Angiosperms	Anomochloa marantoidea	-15.2843	-39.0813
Angiosperms	Couepia insignis	-15.2843	-39.0813
Angiosperms	Parianella carvalhoi	-15.2843	-39.0813
Angiosperms	Senegalia seigleri	-15.2843	-39.0813
Angiosperms	Stigmaphyllon hispidum	-15.2843	-39.0813
Angiosperms	Aechmea heterosepala	-15.139	-39.2742
Angiosperms	Conchocarpus longipes	-15.139	-39.2742
Angiosperms	Dichorisandra ordinatiflora	-15.139	-39.2742
Angiosperms	Ichnanthus longhi-wagneri	-15.139	-39.2742
Angiosperms	Macrocarpaea dolichophylla	-15.139	-39.2742
Angiosperms	Mikania amorimii	-15.139	-39.2742
Angiosperms	Quesnelia clavata	-15.139	-39.2742
Angiosperms	Trattinnickia lorenziana	-15.139	-39.2742
Angiosperms	Vriesea longisepala	-15.139	-39.2742
Angiosperms	Schnella lilacina	-15.2798	-39.2869
Angiosperms	Aphelandra bahiensis	-16.3491	-39.1229
Angiosperms	Senegalia amorimii	-16.5164	-39.2199
Angiosperms	Stromanthe bahiensis	-16.5164	-39.2199
Angiosperms	Alcantarea pataxoana	-17.0342	-39.299
Angiosperms	Griffinia arifolia	-17.4355	-39.2115
Angiosperms	Ipomoea revoluta	-23.6058	-54.9885
Angiosperms	Aldama knobiana	-29.5402	-54.376
Angiosperms	Philodendron rheophyticum	-23.3808	-53.8112
Angiosperms	Dyckia agudensis	-29.6066	-53.3599
Angiosperms	Lathyrus ibicuiensis	-29.6066	-53.3599
Angiosperms	Rhipsalis agudoensis	-29.6066	-53.3599
Angiosperms	Orthosia loandensis	-22.7214	-53.1973
Angiosperms	Cypella altouruguaya	-27.5915	-52.9446
Angiosperms	Gomphrena riparia	-25.441	-52.5114
Angiosperms	Aldama meridionalis	-28.5786	-52.7224
Angiosperms	Calibrachoa serrulata	-26.613	-52.0895
Angiosperms	Oxypetalum morilloanum	-26.613	-52.0895
Angiosperms	Dyschoriste smithii	-27.2024	-52.168
Angiosperms	Dyckia delicata	-29.1088	-52.3159
Angiosperms	Stylosanthes vallsii	-25.4245	-51.7547
Angiosperms	Peperomia retivenulosa	-26.0881	-51.3445
Angiosperms	Dyckia walteriana	-23.8664	-50.8581
Angiosperms	Gomesa leinigii	-23.8664	-50.8581
Angiosperms	Sinningia leucotricha	-23.8664	-50.8581
Angiosperms	Vernonia perangusta	-23.8664	-50.8581
Angiosperms	Oxypetalum oblanceolatum	-24.8499	-51.2973
Angiosperms	Aiouea pseudoglaziovii	-26.2295	-51.0583
Angiosperms	Calibrachoa spathulata	-26.2295	-51.0583
Angiosperms	Matelea dusenii	-26.2295	-51.0583
Angiosperms	Heteranthera catharinensis	-27.0411	-51.3145
Angiosperms	Merostachys vestita	-27.0411	-51.3145
Angiosperms	Panicum magnispicula	-27.0411	-51.3145
Angiosperms	Petunia reitzii	-27.0411	-51.3145
Angiosperms	Calyculogygas serrana	-29.5131	-51.0942
Angiosperms	Codonorchis canisioi	-29.7321	-51.0691
Angiosperms	Rhynchospora enmanuelis	-21.8778	-50.4084
Angiosperms	Matelea reitzii	-27.1899	-50.4573
Angiosperms	Petunia saxicola	-27.7646	-50.399
Angiosperms	Hysterionica nebularis	-28.9285	-50.6699
Angiosperms	Mecardonia pubescens	-28.9285	-50.6699
Angiosperms	Parodia rechensis	-28.9285	-50.6699
Angiosperms	Senecio promatensis	-28.9285	-50.6699
Angiosperms	Sinningia ramboi	-28.9285	-50.6699
Angiosperms	Sisyrinchium flabellatum	-28.9285	-50.6699
Angiosperms	Smallanthus araucariophilus	-28.9285	-50.6699
Angiosperms	Tillandsia chasmophyta	-28.9285	-50.6699
Angiosperms	Merostachys pilifera	-29.5413	-50.6563
Angiosperms	Chevreulia revoluta	-29.2896	-50.7149
Angiosperms	Senecio irgangii	-29.2896	-50.7149
Angiosperms	Oxypetalum reitzii	-26.7741	-49.8797
Angiosperms	Lessingianthus constrictus	-29.5888	-49.9222
Angiosperms	Peperomia ramboi	-29.5888	-49.9222
Angiosperms	Baccharis scabrifolia	-29.5985	-50.1432
Angiosperms	Senecio rauchii	-29.5985	-50.1432
Angiosperms	Calamagrostis reitzii	-27.788	-49.4735
Angiosperms	Cortaderia vaginata	-27.788	-49.4735
Angiosperms	Oxalis odonellii	-27.788	-49.4735
Angiosperms	Peperomia pseudobcordata	-27.788	-49.4735
Angiosperms	Piper kleinii	-27.788	-49.4735
Angiosperms	Piptochaetium palustre	-27.9284	-49.799
Angiosperms	Baccharis chionolaenoides	-28.0484	-49.5878
Angiosperms	Calibrachoa eglandulata	-28.0484	-49.5878
Angiosperms	Passiflora urubiciensis	-28.0484	-49.5878
Angiosperms	Chusquea hatschbachii	-28.0225	-49.43
Angiosperms	Eleocharis guaglianoniana	-28.0225	-49.43
Angiosperms	Chusquea windischii	-28.346	-49.4002
Angiosperms	Hysterionica matzenbacheri	-28.346	-49.4002
Angiosperms	Oxypetalum kleinii	-28.346	-49.4002
Angiosperms	Vriesea rubens	-28.346	-49.4002
Angiosperms	Bothriochloa catharinensis	-28.2949	-49.6877
Angiosperms	Petunia bonjardinensis	-28.2949	-49.6877
Angiosperms	Sida parva	-28.2949	-49.6877
Angiosperms	Zizaniopsis longhi-wagnerae	-28.2949	-49.6877
Angiosperms	Begonia hilariana	-28.7475	-49.6574
Angiosperms	Baccharis scopulorum	-28.0594	-49.2007
Angiosperms	Plantago corvensis	-28.0594	-49.2007
Angiosperms	Digitaria myriostachya	-28.4335	-49.0807
Angiosperms	Rourea pseudospadicea	-23.4519	-48.4678
Angiosperms	Senecio reitzianus	-27.5855	-48.4863
Angiosperms	Mimosa canastrensis	-19.9835	-47.5445
Angiosperms	Mimosa decumbens	-19.9835	-47.5445
Angiosperms	Eriocaulon spongiosifolium	-22.3561	-47.6695
Angiosperms	Peperomia hemmendorffii	-22.3561	-47.6695
Angiosperms	Eithea lagopaivae	-22.725	-47.4379
Angiosperms	Alstroemeria variegata	-21.4494	-47.0812
Angiosperms	Oxypetalum pardense	-21.4494	-47.0812
Angiosperms	Persea rigida	-21.4494	-47.0812
Angiosperms	Piper flavoviride	-21.4494	-47.0812
Angiosperms	Sinningia araneosa	-21.4494	-47.0812
Angiosperms	Sinningia striata	-21.4494	-47.0812
Angiosperms	Piper oblancifolium	-21.983	-46.8572
Angiosperms	Sida japiana	-23.194	-47.0028
Angiosperms	Diplusodon vidalii	-20.8461	-46.792
Angiosperms	Aristolochia insolita	-23.0055	-46.6296
Angiosperms	Piper amparoense	-22.7048	-46.6586
Angiosperms	Petunia mantiqueirensis	-22.83	-46.3862
Angiosperms	Anathallis jordanensis	-22.4263	-45.4767
Angiosperms	Phyllanthus salesiae	-22.4263	-45.4767
Angiosperms	Vriesea claudiana	-21.3045	-45.1238
Angiosperms	Baccharis dichotoma	-21.9389	-45.1419
Angiosperms	Boopis itatiaie	-21.9389	-45.1419
Angiosperms	Chionolaena adpressifolia	-21.9389	-45.1419
Angiosperms	Dyckia pectinata	-21.9389	-45.1419
Angiosperms	Leandra gynoverrucosa	-21.9389	-45.1419
Angiosperms	Lonchocarpus praecox	-21.9389	-45.1419
Angiosperms	Paepalanthus benedictii	-21.9389	-45.1419
Angiosperms	Aechmea aiuruocensis	-21.8658	-44.48
Angiosperms	Campomanesia prosthecesepala	-20.0769	-44.2832
Angiosperms	Cambessedesia tiradentensis	-21.1275	-44.1882
Angiosperms	Chaetostoma cupressinum	-21.1275	-44.1882
Angiosperms	Croton arlineae	-21.1275	-44.1882
Angiosperms	Croton pradensis	-21.1275	-44.1882
Angiosperms	Dyckia argentea	-21.1275	-44.1882
Angiosperms	Mimosa longistipula	-21.1275	-44.1882
Angiosperms	Minaria abortiva	-21.1275	-44.1882
Angiosperms	Vriesea tubipetala	-21.1275	-44.1882
Angiosperms	Chaetostoma inerme	-21.8597	-43.9267
Angiosperms	Chusquea riosaltensis	-21.8597	-43.9267
Angiosperms	Ichnanthus adpressus	-21.8597	-43.9267
Angiosperms	Paepalanthus henriquei	-21.8597	-43.9267
Angiosperms	Paepalanthus viridulus	-21.8597	-43.9267
Angiosperms	Aechmea brueggeri	-22.1589	-43.9558
Angiosperms	Chamaecrista cytisoides	-22.1589	-43.9558
Angiosperms	Macroditassa mantiqueirae	-22.1589	-43.9558
Angiosperms	Ocotea itatiaiae	-22.1589	-43.9558
Angiosperms	Ocotea rupestris	-22.1589	-43.9558
Angiosperms	Ocotea sulcata	-22.1589	-43.9558
Angiosperms	Passiflora rupestris	-22.1589	-43.9558
Angiosperms	Symplocos rizzinii	-22.1589	-43.9558
Angiosperms	Dyckia inflexifolia	-18.6714	-43.4111
Angiosperms	Microlicia trichocalycina	-18.6714	-43.4111
Angiosperms	Eremanthus brevifolius	-18.9794	-43.5959
Angiosperms	Sphinctanthus fluvii-dulcis	-19.3125	-43.3904
Angiosperms	Accara elegans	-20.0257	-43.3481
Angiosperms	Chamaecrista caracensis	-20.0257	-43.3481
Angiosperms	Chamaecrista pilicarpa	-20.0257	-43.3481
Angiosperms	Cipocereus laniflorus	-20.0257	-43.3481
Angiosperms	Paepalanthus xiphophyllus	-20.0257	-43.3481
Angiosperms	Symplocos angulata	-20.0257	-43.3481
Angiosperms	Symplocos microstyla	-20.0257	-43.3481
Angiosperms	Vriesea marceloi	-20.0257	-43.3481
Angiosperms	Chionanthus greenii	-19.8991	-43.3869
Angiosperms	Maytenus radlkoferiana	-19.9779	-43.5775
Angiosperms	Paepalanthus garimpensis	-19.9779	-43.5775
Angiosperms	Hyptidendron claussenii	-20.066	-43.4768
Angiosperms	Luxemburgia corymbosa	-20.066	-43.4768
Angiosperms	Actinocephalus giuliettiae	-20.1753	-43.593
Angiosperms	Lapanthus vidaliorum	-20.1753	-43.593
Angiosperms	Actinocephalus falcifolius	-20.3655	-43.3911
Angiosperms	Baccharis variabiliflora	-20.3655	-43.3911
Angiosperms	Colanthelia distans	-20.3655	-43.3911
Angiosperms	Dyckia densiflora	-20.3655	-43.3911
Angiosperms	Eriocnema acaulis	-20.3655	-43.3911
Angiosperms	Habenaria itaculumia	-20.3655	-43.3911
Angiosperms	Mikania badiniana	-20.3655	-43.3911
Angiosperms	Persea pedunculosa	-20.3655	-43.3911
Angiosperms	Stevia alexii	-20.3655	-43.3911
Angiosperms	Hindsia ibitipocensis	-21.6559	-43.7768
Angiosperms	Ipomoea longirostra	-21.6559	-43.7768
Angiosperms	Lessingianthus ibitipocensis	-21.6559	-43.7768
Angiosperms	Cuphea adenophylla	-18.1453	-43.1067
Angiosperms	Comanthera brasiliana	-18.2794	-43.0686
Angiosperms	Comanthera magnifica	-18.2794	-43.0686
Angiosperms	Comanthera suberosa	-18.2794	-43.0686
Angiosperms	Agalinis itambensis	-18.4822	-43.2952
Angiosperms	Croton stellatoferrugineus	-18.4822	-43.2952
Angiosperms	Lapanthus itambense	-18.4822	-43.2952
Angiosperms	Paepalanthus aleurophyllus	-18.4822	-43.2952
Angiosperms	Stemodia stellata	-18.4822	-43.2952
Angiosperms	Vriesea medusa	-18.4822	-43.2952
Angiosperms	Xyris itambensis	-18.4822	-43.2952
Angiosperms	Paepalanthus hirtellus	-18.4699	-43.1886
Angiosperms	Actinocephalus callophyllus	-18.607	-43.3267
Angiosperms	Actinocephalus glabrescens	-18.607	-43.3267
Angiosperms	Actinocephalus koernickeanus	-18.607	-43.3267
Angiosperms	Actinocephalus verae	-18.607	-43.3267
Angiosperms	Diplusodon saxatilis	-18.607	-43.3267
Angiosperms	Nectandra venulosa	-18.607	-43.3267
Angiosperms	Vellozia costata	-18.607	-43.3267
Angiosperms	Paepalanthus digitiformis	-19.0491	-43.3153
Angiosperms	Pfaffia cipoana	-19.4879	-43.2932
Angiosperms	Homalolepis suaveolens	-19.696	-43.2189
Angiosperms	Deianira damazioi	-20.2613	-43.2992
Angiosperms	Paepalanthus langsdorffii	-20.2613	-43.2992
Angiosperms	Staurogyne vauthieriana	-20.2613	-43.2992
Angiosperms	Coussapoa floccosa	-20.7905	-42.904
Angiosperms	Peperomia rufispica	-20.7905	-42.904
Angiosperms	Strychnos cerradoensis	-20.7905	-42.904
Angiosperms	Besleria meridionalis	-21.5153	-43.1684
Angiosperms	Calyptranthes detecta	-21.5153	-43.1684
Angiosperms	Dahlstedtia peckoltii	-21.5153	-43.1684
Angiosperms	Nidularium azureum	-21.5153	-43.1684
Angiosperms	Kielmeyera aureovinosa	-21.9817	-42.9137
Angiosperms	Chamaecrista ixodes	-17.8023	-42.7039
Angiosperms	Comanthera brunnea	-17.8023	-42.7039
Angiosperms	Uebelmannia buiningii	-17.8023	-42.7039
Angiosperms	Vriesea serranegrensis	-17.8023	-42.7039
Angiosperms	Zollernia cowanii	-19.225	-42.6952
Angiosperms	Eremitis magnifica	-19.4195	-42.3911
Angiosperms	Merostachys tatianae	-19.5289	-42.6295
Angiosperms	Trattinnickia ferruginea	-19.6758	-42.7665
Angiosperms	Myrcia macucana	-19.6367	-42.5534
Angiosperms	Adenocalymma cinereum	-19.7377	-42.6091
Angiosperms	Piper rio-docense	-19.7377	-42.6091
Angiosperms	Neoregelia brigadeirensis	-20.6067	-42.5425
Angiosperms	Smilax pilosa	-20.7137	-42.5346
Angiosperms	Merostachys ramosa	-20.8192	-42.3472
Angiosperms	Neoregelia brownii	-20.8192	-42.3472
Angiosperms	Alcantarea acuminatifolia	-21.7288	-42.6849
Angiosperms	Coleocephalocereus purpureus	-16.2861	-41.8874
Angiosperms	Orthophytum elegans	-16.5322	-42.1135
Angiosperms	Aechmea timida	-19.3281	-41.8512
Angiosperms	Canavalia reflexiflora	-19.6275	-42.118
Angiosperms	Achetaria caparaoense	-20.593	-41.9374
Angiosperms	Agalinis bandeirensis	-20.593	-41.9374
Angiosperms	Anthurium mourae	-20.593	-41.9374
Angiosperms	Baccharis dubia	-20.593	-41.9374
Angiosperms	Nothochilus coccineus	-20.593	-41.9374
Angiosperms	Paepalanthus caparoensis	-20.593	-41.9374
Angiosperms	Phymatidium geiselii	-20.593	-41.9374
Angiosperms	Polygala vollii	-20.593	-41.9374
Angiosperms	Calyptranthes carangola	-20.8128	-42.0631
Angiosperms	Dichorisandra leonii	-20.8128	-42.0631
Angiosperms	Diospyros mexiae	-20.8128	-42.0631
Angiosperms	Riedeliella magalhaesii	-16.5684	-41.4521
Angiosperms	Stachytarpheta alata	-16.5684	-41.4521
Angiosperms	Syagrus kellyana	-16.5684	-41.4521
Angiosperms	Alcantarea lanceopetala	-17.263	-41.4132
Angiosperms	Anthurium mucuri	-17.8259	-41.3598
Angiosperms	Axonopus graniticola	-17.8259	-41.3598
Angiosperms	Marsdenia otoniensis	-17.8259	-41.3598
Angiosperms	Orthophytum teofilo-otonense	-17.8259	-41.3598
Angiosperms	Orthophytum santaritense	-19.3597	-41.3664
Angiosperms	Eremanthus ovatifolius	-19.3389	-41.6162
Angiosperms	Chresta filicifolia	-19.2026	-41.3647
Angiosperms	Drosera magnifica	-19.172	-41.4417
Angiosperms	Alcantarea nana	-19.2493	-41.6689
Angiosperms	Orthophytum vasconcelosianum	-19.2493	-41.6689
Angiosperms	Vriesea sanctaparecidae	-19.2493	-41.6689
Angiosperms	Begonia caparaoensis	-20.2644	-41.7726
Angiosperms	Genlisea lobata	-20.2644	-41.7726
Angiosperms	Trimezia campanula	-20.2644	-41.7726
Angiosperms	Baccharis hemiptera	-20.5099	-41.6741
Angiosperms	Buddleja longiflora	-20.5099	-41.6741
Angiosperms	Myrcia altomontana	-20.5099	-41.6741
Angiosperms	Oxypetalum leonii	-20.5099	-41.6741
Angiosperms	Passiflora junqueirae	-20.5099	-41.6741
Angiosperms	Nidularium alegrense	-20.548	-41.5052
Angiosperms	Siderasis zorzanellii	-20.548	-41.5052
Angiosperms	Miconia valentinensis	-20.3162	-41.5581
Angiosperms	Roupala gertii	-20.3162	-41.5581
Angiosperms	Aiouea rubrinervia	-15.9695	-41.1814
Angiosperms	Alcantarea burle-marxii	-15.9695	-41.1814
Angiosperms	Cyanocephalus viaticus	-15.9695	-41.1814
Angiosperms	Alcantarea distractila	-18.0499	-41.2061
Angiosperms	Adenocalymma apetiolatum	-18.6751	-40.9528
Angiosperms	Adenocalymma lineare	-18.6751	-40.9528
Angiosperms	Aechmea aguadocensis	-18.6751	-40.9528
Angiosperms	Alcantarea nigripetala	-18.6751	-40.9528
Angiosperms	Alcantarea vasconcelosiana	-18.6751	-40.9528
Angiosperms	Cryptanthus venecianus	-18.6751	-40.9528
Angiosperms	Eugenia sobraliana	-18.6751	-40.9528
Angiosperms	Heteropterys serrata	-18.6751	-40.9528
Angiosperms	Kielmeyera rupestris	-18.6751	-40.9528
Angiosperms	Pitcairnia glauca	-18.6751	-40.9528
Angiosperms	Pleroma costatocalyx	-18.6751	-40.9528
Angiosperms	Stigmatodon bifidus	-18.6751	-40.9528
Angiosperms	Stigmatodon magnibracteatus	-18.6751	-40.9528
Angiosperms	Ipomoea scopulina	-19.2253	-40.8485
Angiosperms	Pleroma marinanum	-19.2253	-40.8485
Angiosperms	Stigmatodon euclidianus	-19.5103	-40.8513
Angiosperms	Conchocarpus oppositifolius	-14.9448	-40.413
Angiosperms	Chamaecrista compitalis	-15.3149	-40.7226
Angiosperms	Chrysophyllum subspinosum	-15.3149	-40.7226
Angiosperms	Ophthalmoblapton parviflorum	-15.3149	-40.7226
Angiosperms	Pouteria velutinicarpa	-15.3149	-40.7226
Angiosperms	Quesnelia conquistensis	-15.3149	-40.7226
Angiosperms	Philodendron ricardoi	-18.2361	-40.7871
Angiosperms	Alcantarea longibracteata	-19.0456	-40.5715
Angiosperms	Alcantarea simplicisticha	-19.0456	-40.5715
Angiosperms	Begonia aguiabrancensis	-19.0456	-40.5715
Angiosperms	Begonia wasshauseniana	-19.0456	-40.5715
Angiosperms	Senecio espiritosantensis	-19.0456	-40.5715
Angiosperms	Campomanesia sepalifolia	-18.8963	-40.785
Angiosperms	Herpetacanthus longipetiolatus	-18.8963	-40.785
Angiosperms	Senegalia grazielae	-18.8963	-40.785
Angiosperms	Plinia longa	-19.1996	-40.5059
Angiosperms	Handroanthus arianeae	-19.4284	-40.4117
Angiosperms	Handroanthus cristatus	-19.4284	-40.4117
Angiosperms	Raddia lancifolia	-19.4284	-40.4117
Angiosperms	Tabebuia reticulata	-19.4284	-40.4117
Angiosperms	Turnera sancta	-19.4	-40.6804
Angiosperms	Senecio hortensiae	-19.1507	-40.7378
Angiosperms	Orthophytum zanonii	-19.1093	-40.8096
Angiosperms	Alcantarea trepida	-19.414	-40.7831
Angiosperms	Kielmeyera sigillata	-19.414	-40.7831
Angiosperms	Neoregelia rothinessa	-14.7191	-40.1222
Angiosperms	Neoregelia viridolineata	-14.7191	-40.1222
Angiosperms	Vriesea minutiflora	-14.7191	-40.1222
Angiosperms	Aechmea altocaririensis	-16.0217	-39.9831
Angiosperms	Aechmea recurvipetala	-16.0217	-39.9831
Angiosperms	Alstroemeria calliantha	-16.0217	-39.9831
Angiosperms	Merostachys espessae	-16.0217	-39.9831
Angiosperms	Neoregelia viridovinosa	-16.0217	-39.9831
Angiosperms	Passiflora boticarioana	-16.0217	-39.9831
Angiosperms	Quesnelia tubifolia	-16.0217	-39.9831
Angiosperms	Stigmatodon rosulatulus	-16.0217	-39.9831
Angiosperms	Syagrus itapebiensis	-16.0217	-39.9831
Angiosperms	Syagrus santosii	-16.0217	-39.9831
Angiosperms	Cryptanthus ilhanus	-16.5024	-39.9132
Angiosperms	Merostachys argentea	-16.5024	-39.9132
Angiosperms	Olyra latispicula	-16.5024	-39.9132
Angiosperms	Orthophytum guaratingense	-16.5024	-39.9132
Angiosperms	Cryptanthus viridipetalus	-18.235	-40.1924
Angiosperms	Eugenia kuekii	-18.235	-40.1924
Angiosperms	Hohenbergia mutabilis	-18.235	-40.1924
Angiosperms	Alatococcus siqueirae	-19.4935	-39.9195
Angiosperms	Mouriri morleyii	-19.2988	-40.313
Angiosperms	Conchocarpus bellus	-19.371	-40.2749
Angiosperms	Conchocarpus cauliflorus	-19.371	-40.2749
Angiosperms	Eugenia viscacea	-12.6954	-39.4757
Angiosperms	Ormosia timboensis	-13.254	-39.715
Angiosperms	Denscantia andrei	-13.5485	-39.708
Angiosperms	Eugenia caloneura	-13.5485	-39.708
Angiosperms	Pavonia gerleniae	-13.5485	-39.708
Angiosperms	Bertolonia hirsutissima	-14.0771	-39.8158
Angiosperms	Rudgea agresteophila	-14.0771	-39.8158
Angiosperms	Aechmea guaratingensis	-16.8666	-39.8109
Angiosperms	Marsdenia carvalhoi	-16.8666	-39.8109
Angiosperms	Ossaea loligomorpha	-16.8666	-39.8109
Angiosperms	Dahlstedtia bahiana	-12.5592	-39.139
Angiosperms	Calyptranthes anguerana	-12.0835	-39.2959
Angiosperms	Passiflora jiboiaensis	-13.033	-39.2596
Angiosperms	Begonia delicata	-12.974	-39.0146
Angiosperms	Heteropterys jardimii	-12.9535	-39.23
Angiosperms	Inga conchifolia	-12.9535	-39.23
Angiosperms	Staelia catechosperma	-12.9535	-39.23
Angiosperms	Myrcia truncata	-13.1705	-39.2225
Angiosperms	Myrcia spathulifolia	-13.9547	-38.9519
Angiosperms	Adelobotrys atlantica	-14.9905	-39.0127
Angiosperms	Eugenia unana	-15.3238	-38.9996
Angiosperms	Cryptanthus viridovinosus	-12.1794	-38.4255
Angiosperms	Hohenbergia reconcavensis	-12.4528	-38.8238
Angiosperms	Bactris soeiroana	-12.8149	-38.4855
Angiosperms	Chamaecrista salvatoris	-12.8149	-38.4855
Angiosperms	Erythroxylum leal-costae	-12.8149	-38.4855
Angiosperms	Ilex blanchetii	-12.8149	-38.4855
Angiosperms	Isachne salzmannii	-12.8149	-38.4855
Angiosperms	Moldenhawera nutans	-12.8149	-38.4855
Angiosperms	Ocotea thinicola	-12.8149	-38.4855
Angiosperms	Psittacanthus salvadorensis	-12.8149	-38.4855
Angiosperms	Rourea blanchetiana	-12.8149	-38.4855
Angiosperms	Piper robustipedunculum	-12.9871	-38.6782
Angiosperms	Spigelia genuflexa	-11.9749	-38.2546
Angiosperms	Pouteria synsepala	-12.1116	-38.0313
Angiosperms	Rhabdodendron gardnerianum	-12.1327	-38.0601
Angiosperms	Melocactus sergipensis	-11.09	-37.6358
Angiosperms	Zanthoxylum unifoliolatum	-10.8043	-37.2144
Angiosperms	Mcvaughia sergipana	-10.6746	-36.8338
Angiosperms	Eugenia pipensis	-6.16524	-35.1226
Angiosperms	Lacandonia brasiliana	-6.7037	-35.0277
Angiosperms	Hohenbergia aechmeoides	-7.13039	-34.8744
Terrestrial vertebrates: snakes	Calamodontophis ronaldoi	-25.25	-49.5833
Terrestrial vertebrates: snakes	Corallus cropanii	-24.52	-48.108
Terrestrial vertebrates: snakes	Corallus cropanii	-24.388	-47.926
Terrestrial vertebrates: snakes	Corallus cropanii	-24.281	-47.46
Terrestrial vertebrates: snakes	Corallus cropanii	-24.275	-47.233
Terrestrial vertebrates: snakes	Atractus caete	-9.2583	-36.3
Terrestrial vertebrates: snakes	Bothrops muriciensis	-9.307	-35.943
Terrestrial vertebrates: snakes	Echinanthera cephalomaculata	-8.3625	-36.0316
Terrestrial vertebrates: snakes	Dendrophidion atlantica	-9.6667	-35.7167
Terrestrial vertebrates: snakes	Dendrophidion atlantica	-9.4783	-35.8533
Terrestrial vertebrates: snakes	Dendrophidion atlantica	-9.3779	-35.8371
Terrestrial vertebrates: snakes	Dendrophidion atlantica	-9.2333	-35.8
Terrestrial vertebrates: snakes	Dendrophidion atlantica	-8.9725	-35.9394
Terrestrial vertebrates: snakes	Tropidophis grapiuna	-15.3829	-39.5497
Terrestrial vertebrates: snakes	Bothrops insularis	-24.4847	-46.6756
Terrestrial vertebrates: snakes	Bothrops otavioi	-23.75	-45.0083
Terrestrial vertebrates: snakes	Bothrops otavioi	-23.7514	-45.0159
Terrestrial vertebrates: snakes	Calamodontophis ronaldoi	-26.4333	-51.3167
Terrestrial vertebrates: snakes	Liotyphlops caissara	-23.8458	-45.3533
Terrestrial vertebrates: snakes	Liotyphlops caissara	-23.55	-45.0666
Terrestrial vertebrates: snakes	Tropidophis grapiuna	-14.678	-40.378
Terrestrial vertebrates: snakes	Tropidophis preciosus	-20.4167	-43.4667
